# Supplementary material for: Naphthoquinone Derivatives from Angustimassarina populi CF-097565 Display Anti-Tumour Activity in 3D Cultures of Breast Cancer Cells
Source: MDPI journal article supplement (doi:10.3390/molecules29020425), 2024-01-15
Supplement: s1 [file s1]

## Supplementary Materials

### **Naphthoquinone Derivatives from *Angustimassarina populi* CF-097565 Display Anti-tumour Activity in 3D Cultures of Breast Cancer cells**

Thomas A. Mackenzie<sup>1</sup>, Fernando Reyes<sup>1</sup>, Marta Martinez<sup>1</sup>, Victor González-Menéndez<sup>1</sup>, Isabel Sánchez<sup>1</sup>, Olga Genilloud <sup>1</sup>, Jose R. Tormo<sup>1,\*</sup> and Maria C. Ramos<sup>1,\*</sup>

<sup>1</sup>Fundación MEDINA, Av. Conocimiento 34, Health Sciences Technology Park, 18016 Granada, Spain

\*Correspondence: [ruben.tormo@medinaandalucia.es](mailto:ruben.tormo@medinaandalucia.es) (J.R.T.); [Carmen.ramos@medinaandalucia.es](mailto:Carmen.ramos@medinaandalucia.es) (M.C.R); Tel.: +34 958 993 965

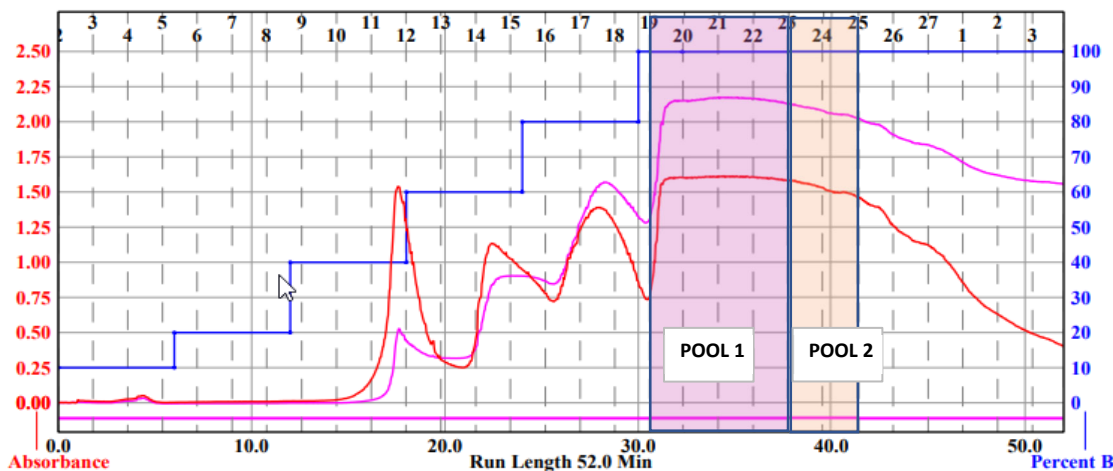

**Figure S1.** UV (210, red, and 280, pink trace, nm) chromatogram of preparative RP-Flash Chromatography of a 3L extract of the strain fermentation, in a stepped gradient (blue trace) of acetone in water from 10% to 100% of acetone in 52 min (6 min/step). Fractions combined according to similar bioactivity profile and chemical complexity are indicated as POOL 1 and 2.

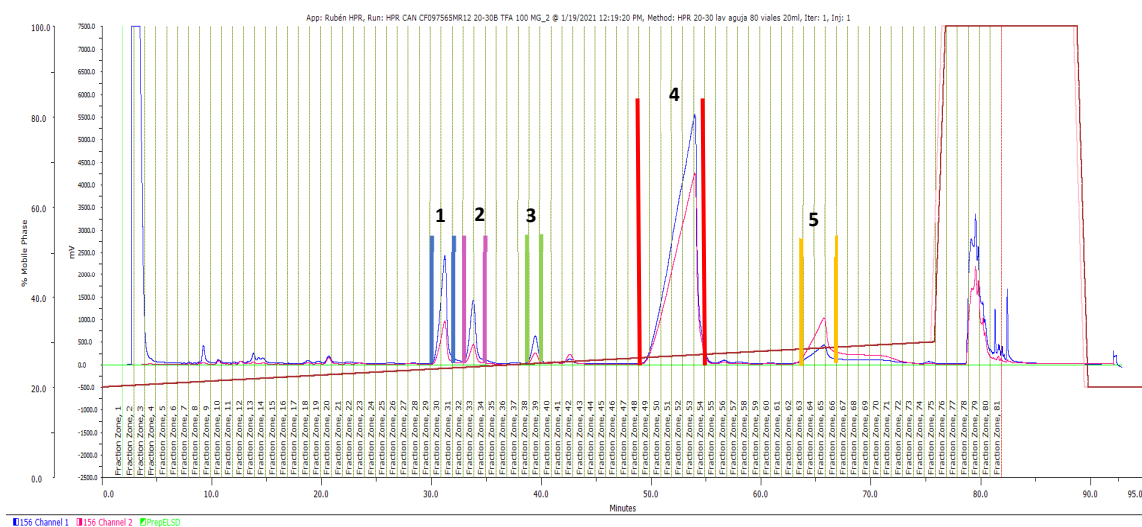

**Figure S2.** LC-UV (210, blue, and 280, orange trace, nm) chromatogram of POOL1 purification by preparative RP-HPLC applying a linear H<sub>2</sub>O:CH<sub>3</sub>CN gradient (CH<sub>3</sub>CN: 20-30%: 1-76 min, 100%: 77-90 min). Both solvents contain 0.1% TFA. POOL2 behaved similarly.

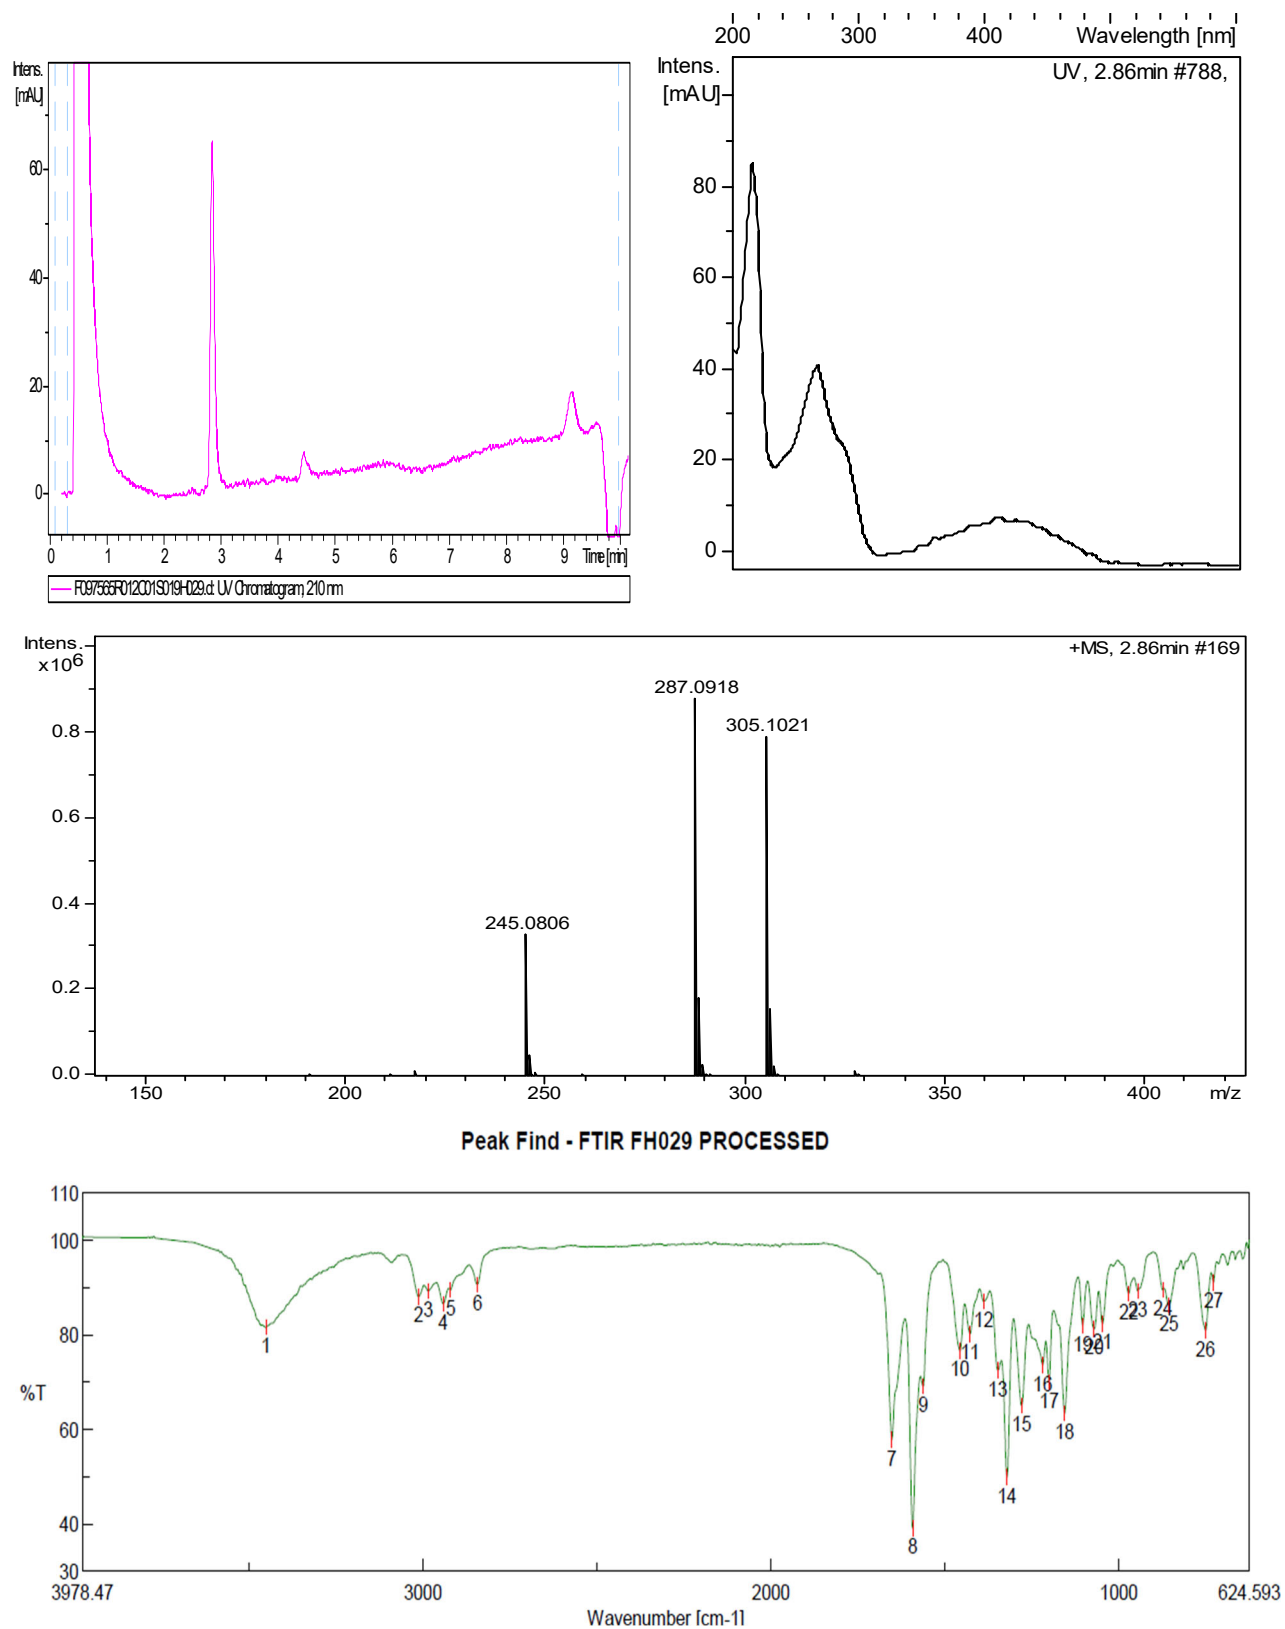

**Figure S3.** HPLC 210 nm trace, UV-Vis, ((+)-ESI-TOF) and IR spectra of compound **1** (purity 90% by UV).

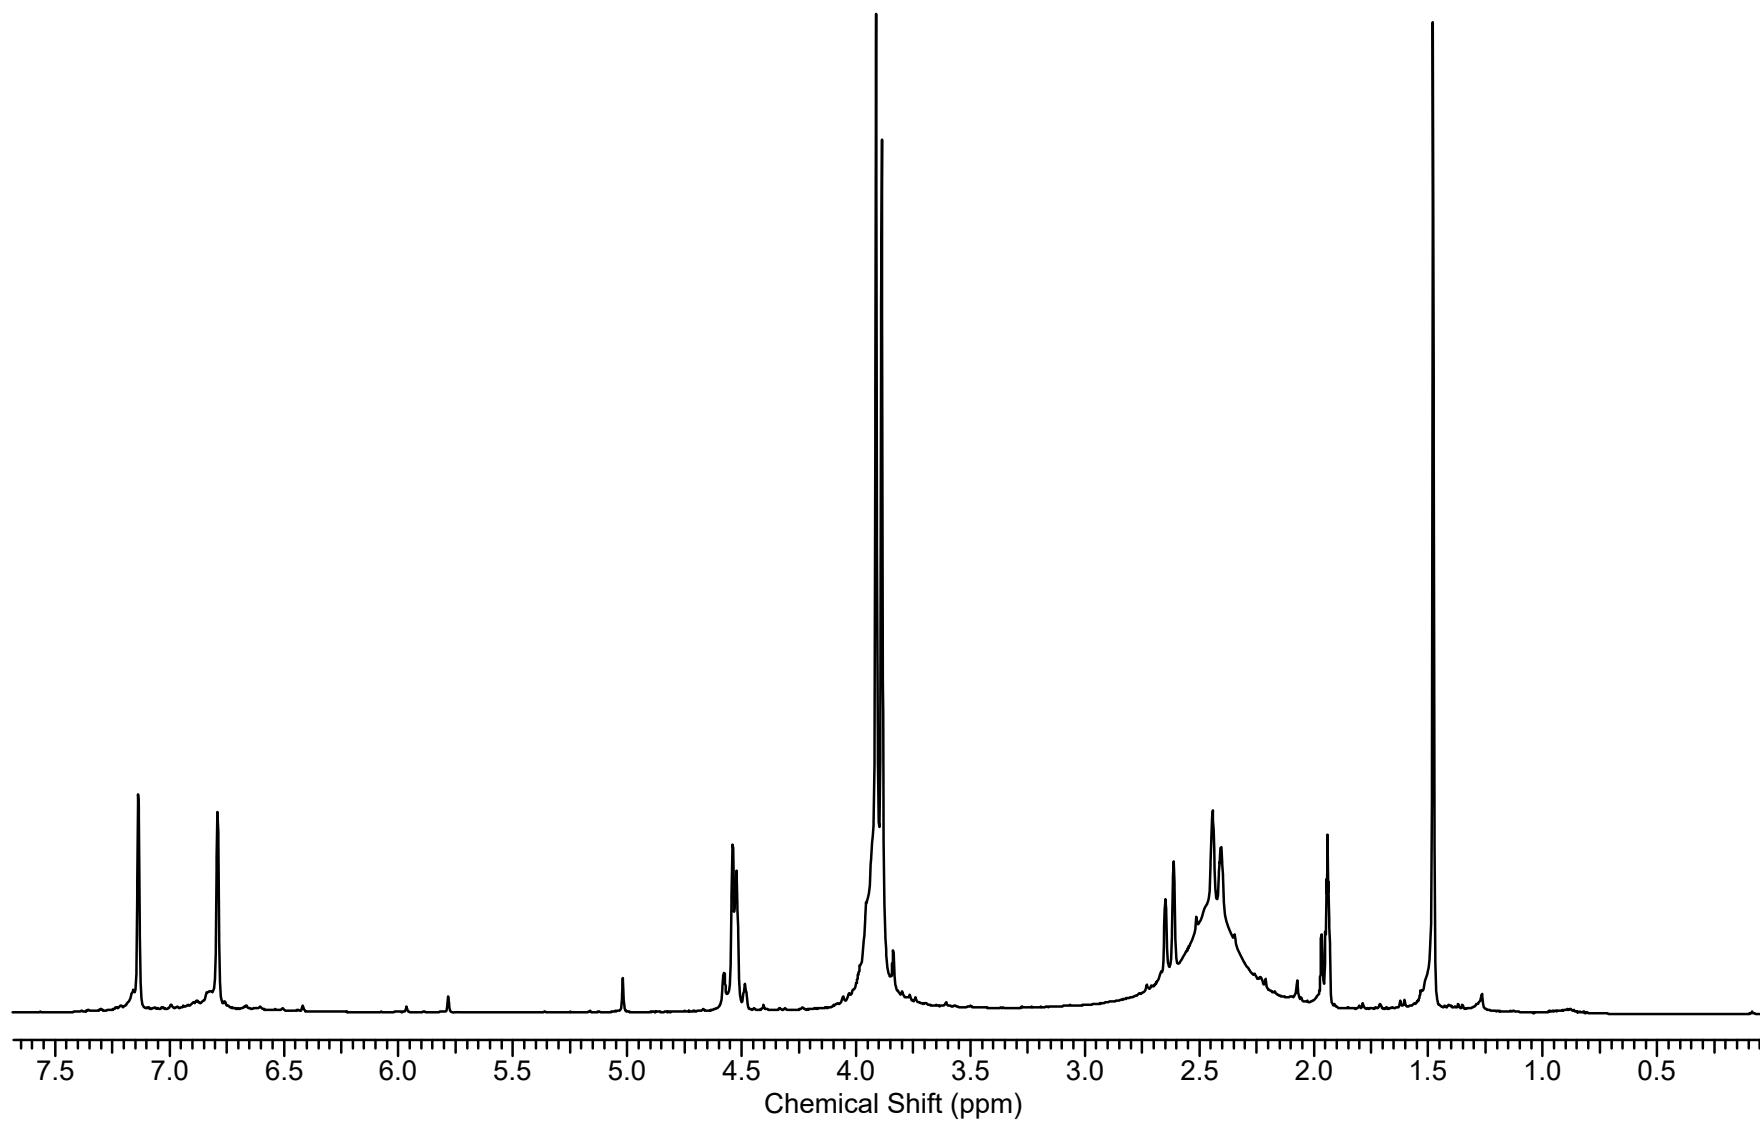

**Figure S4.**  $^1\text{H}$  NMR spectrum ( $\text{DMSO}-d_6$ ) of compound 1.

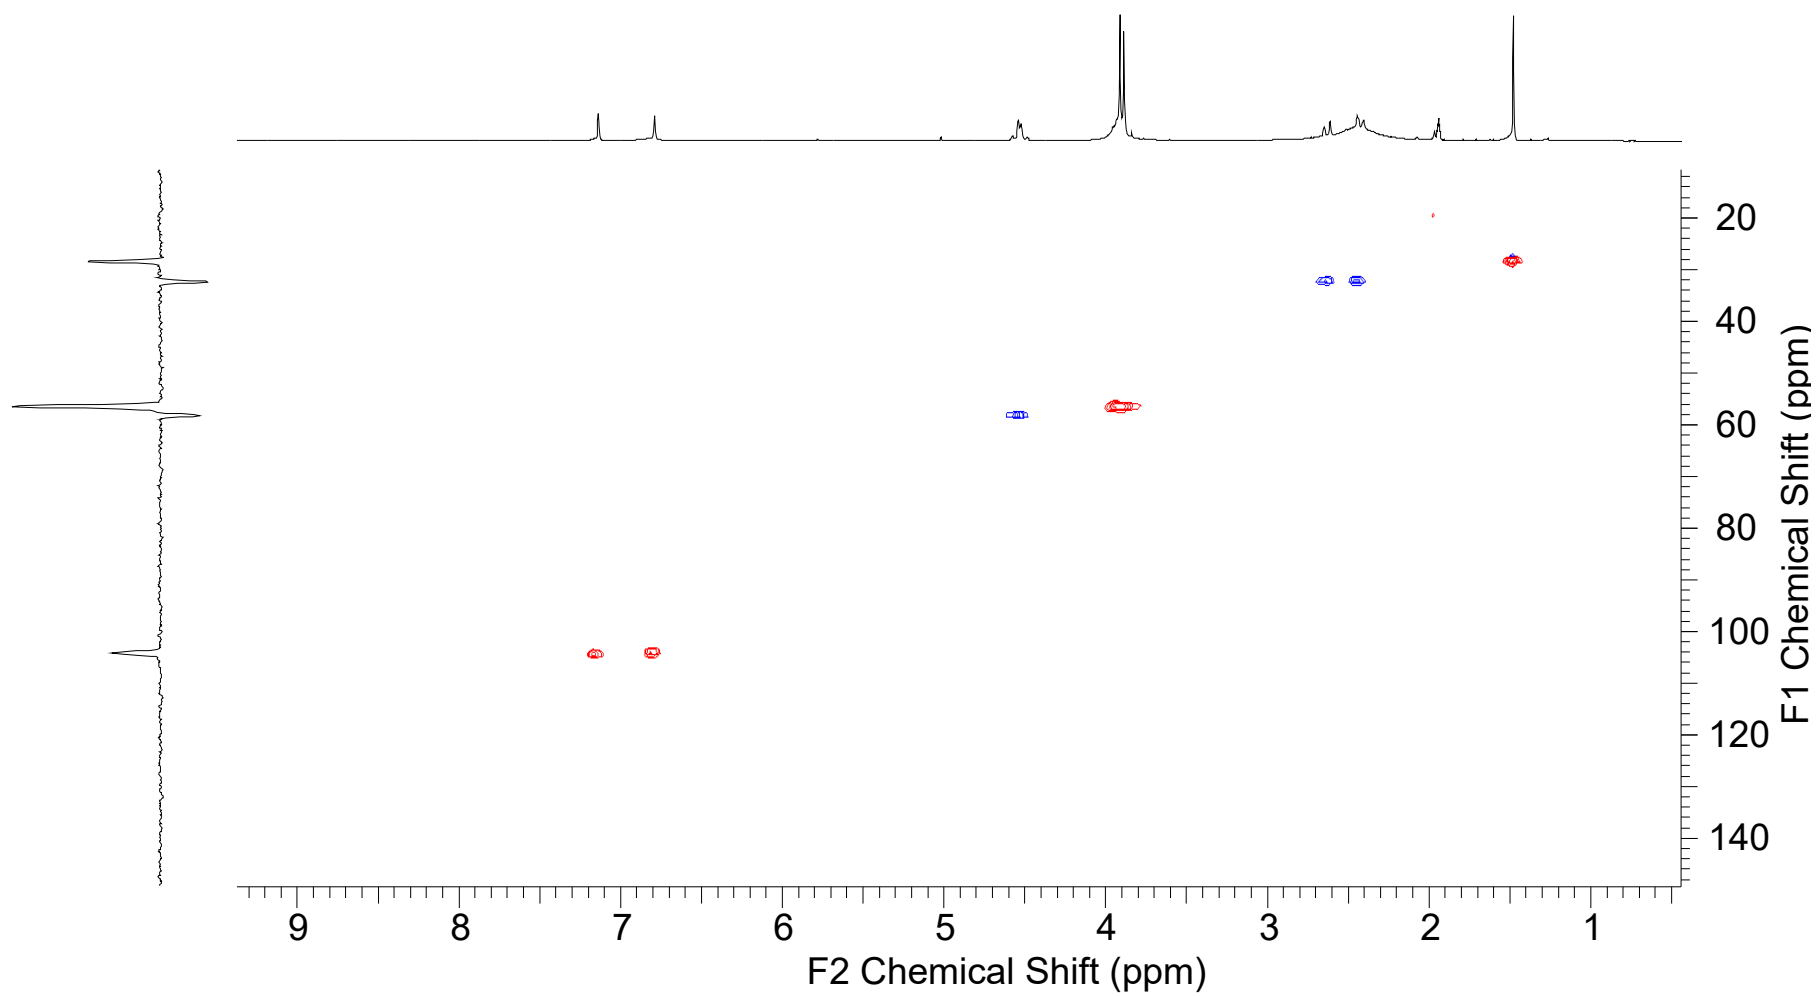

Figure S5. HSQC spectrum (DMSO- $d_6$ ) of compound 1.

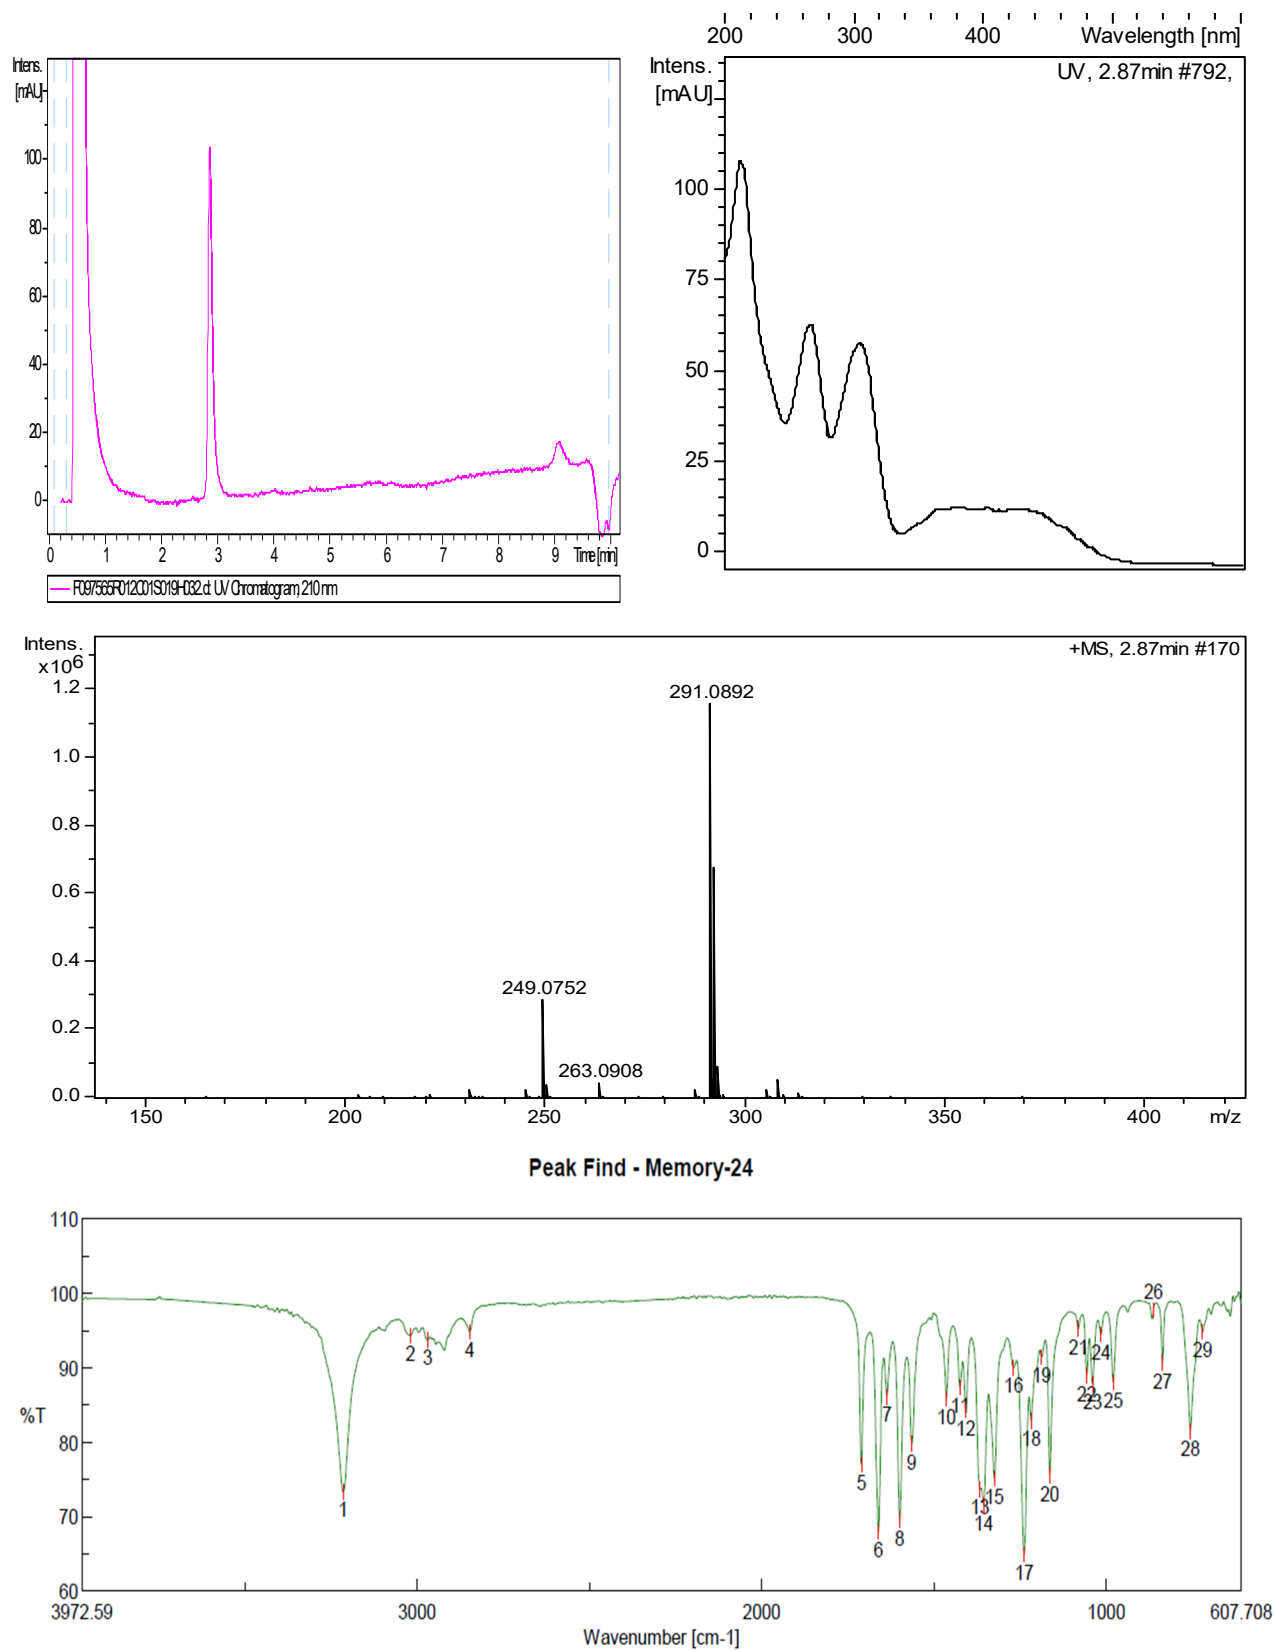

**Figure S6.** HPLC 210 nm trace, UV-Vis, ((+)-ESI-TOF) and IR spectra of compound **2** (purity 99% by UV).

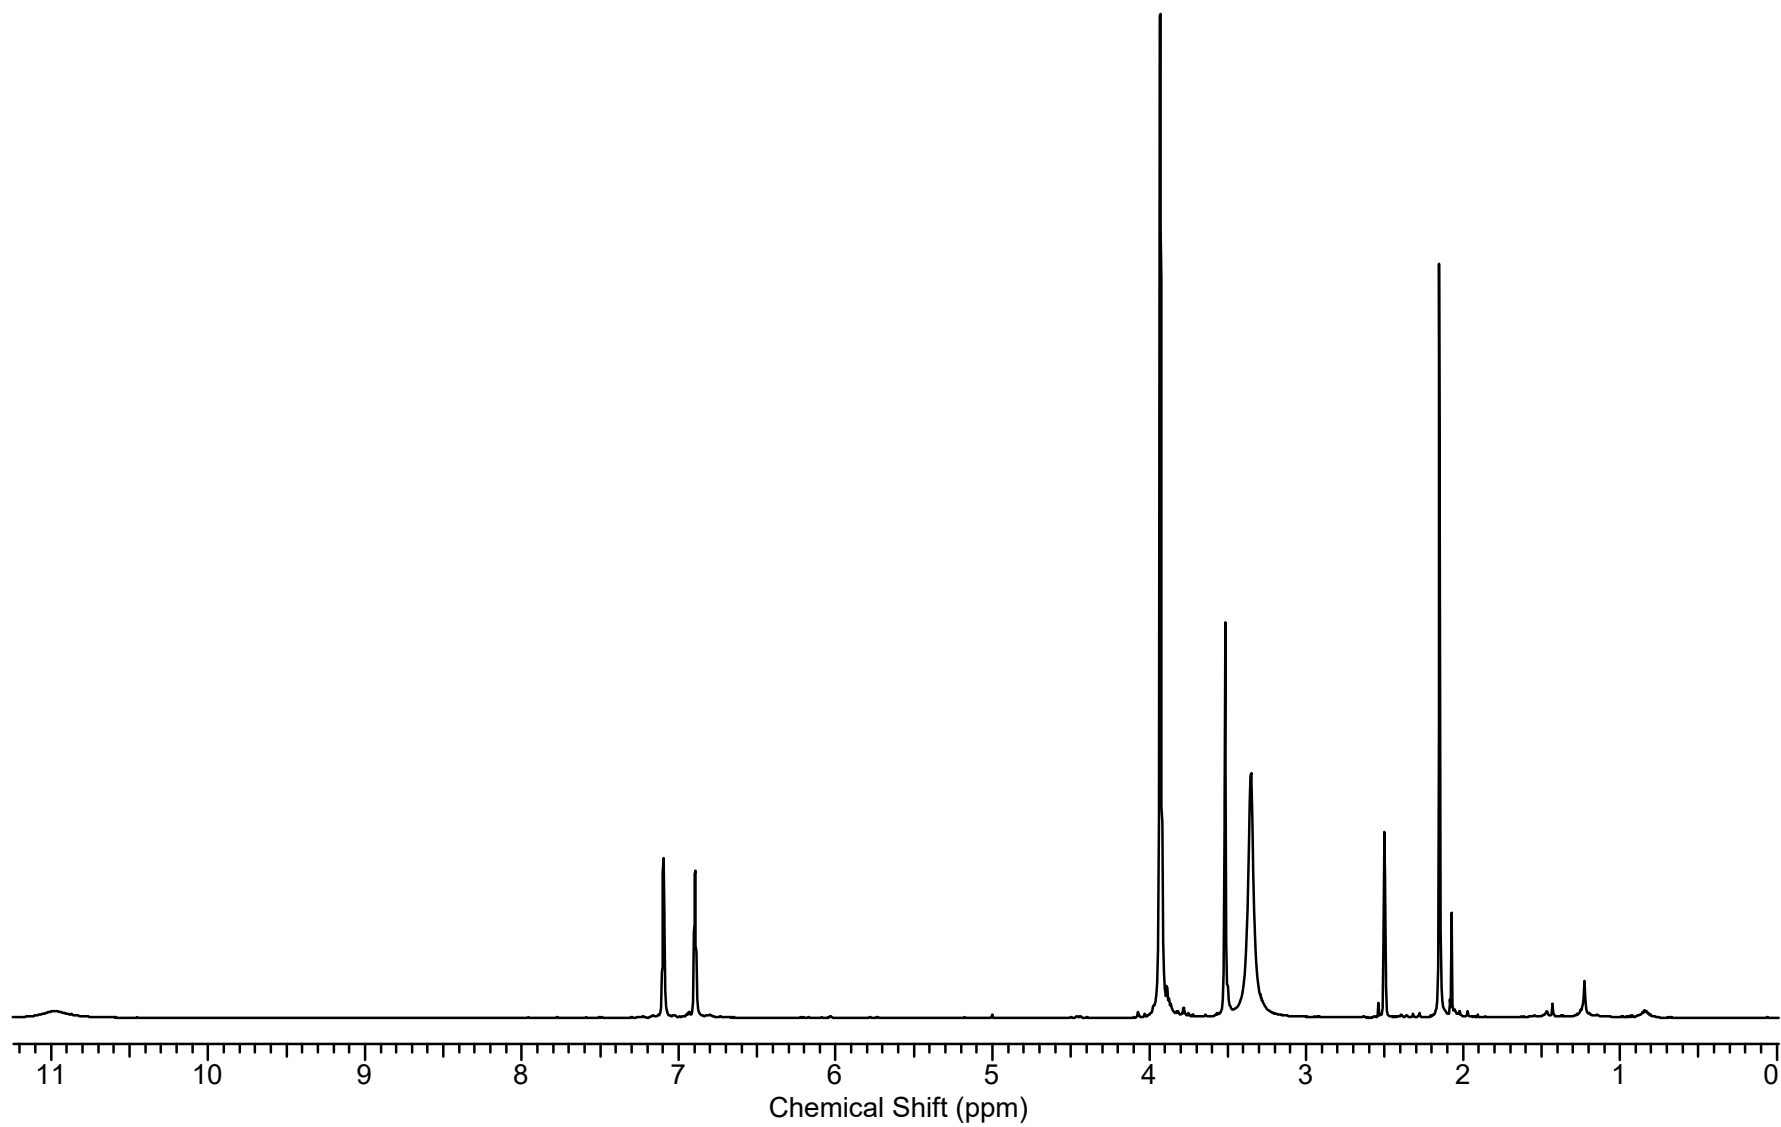

**Figure S7.**  $^1\text{H}$  NMR spectrum ( $\text{DMSO}-d_6$ ) of compound 2.

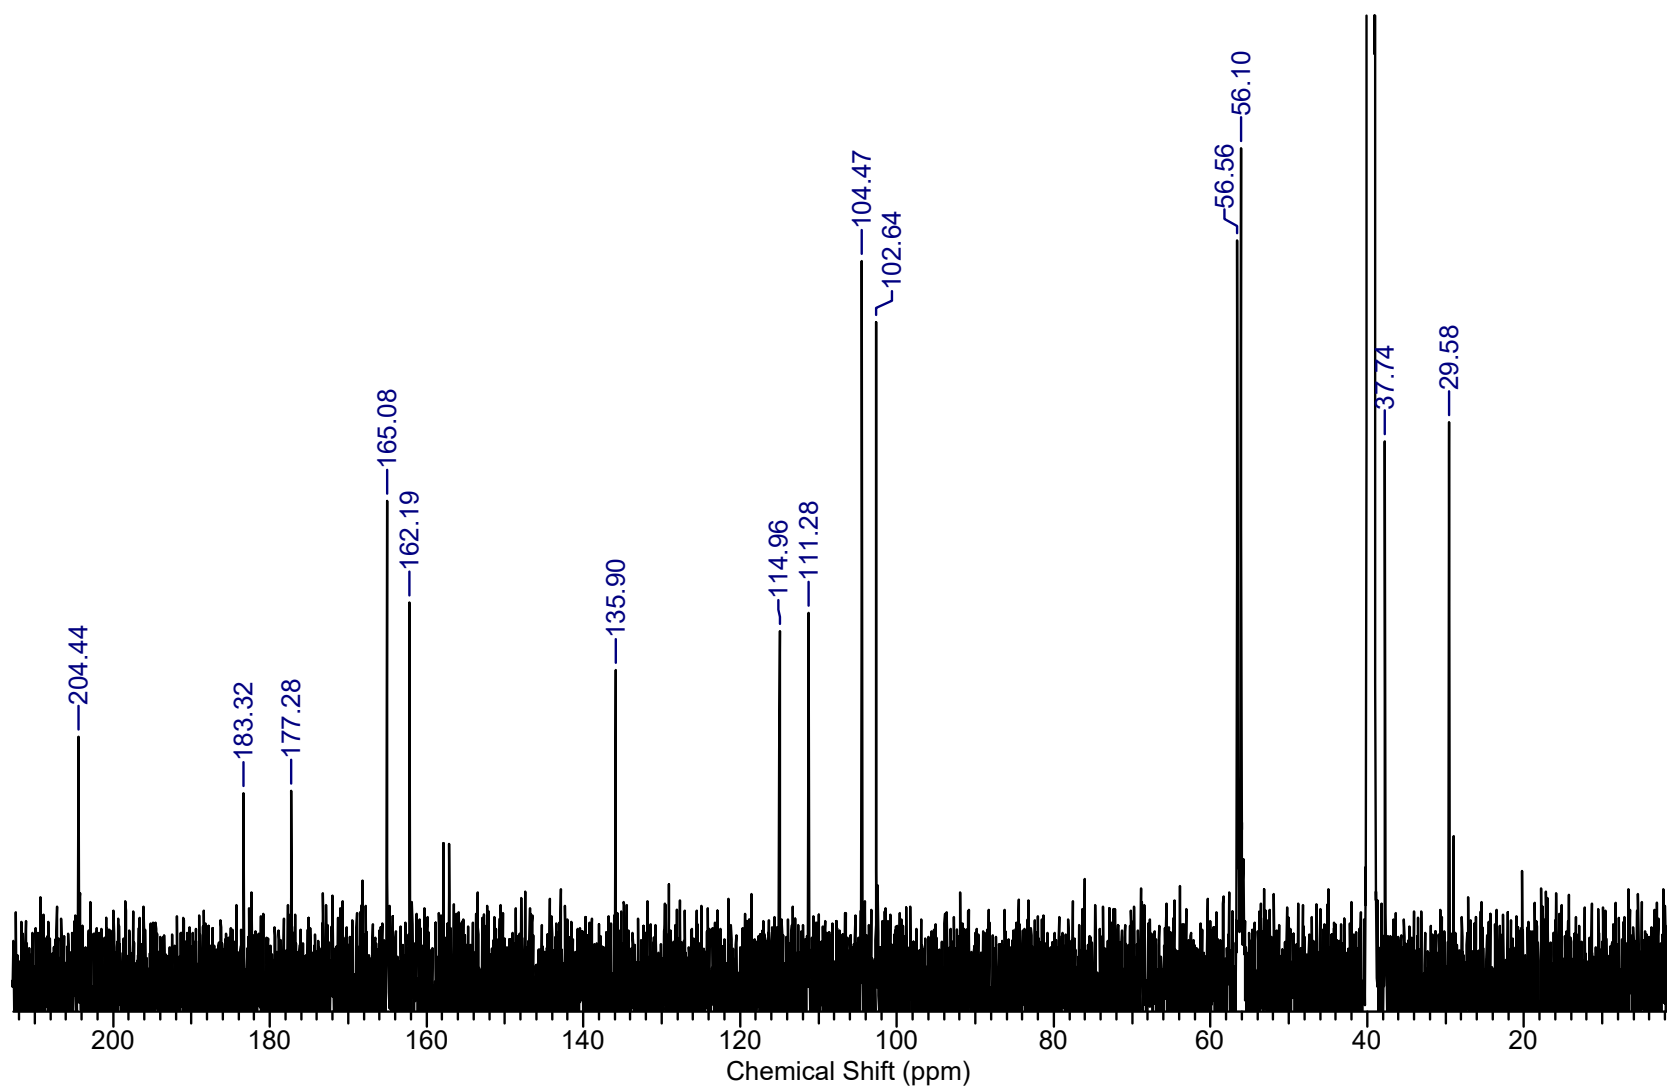

**Figure S8.** <sup>13</sup>C NMR spectrum (DMSO-*d*<sub>6</sub>) of compound 2.



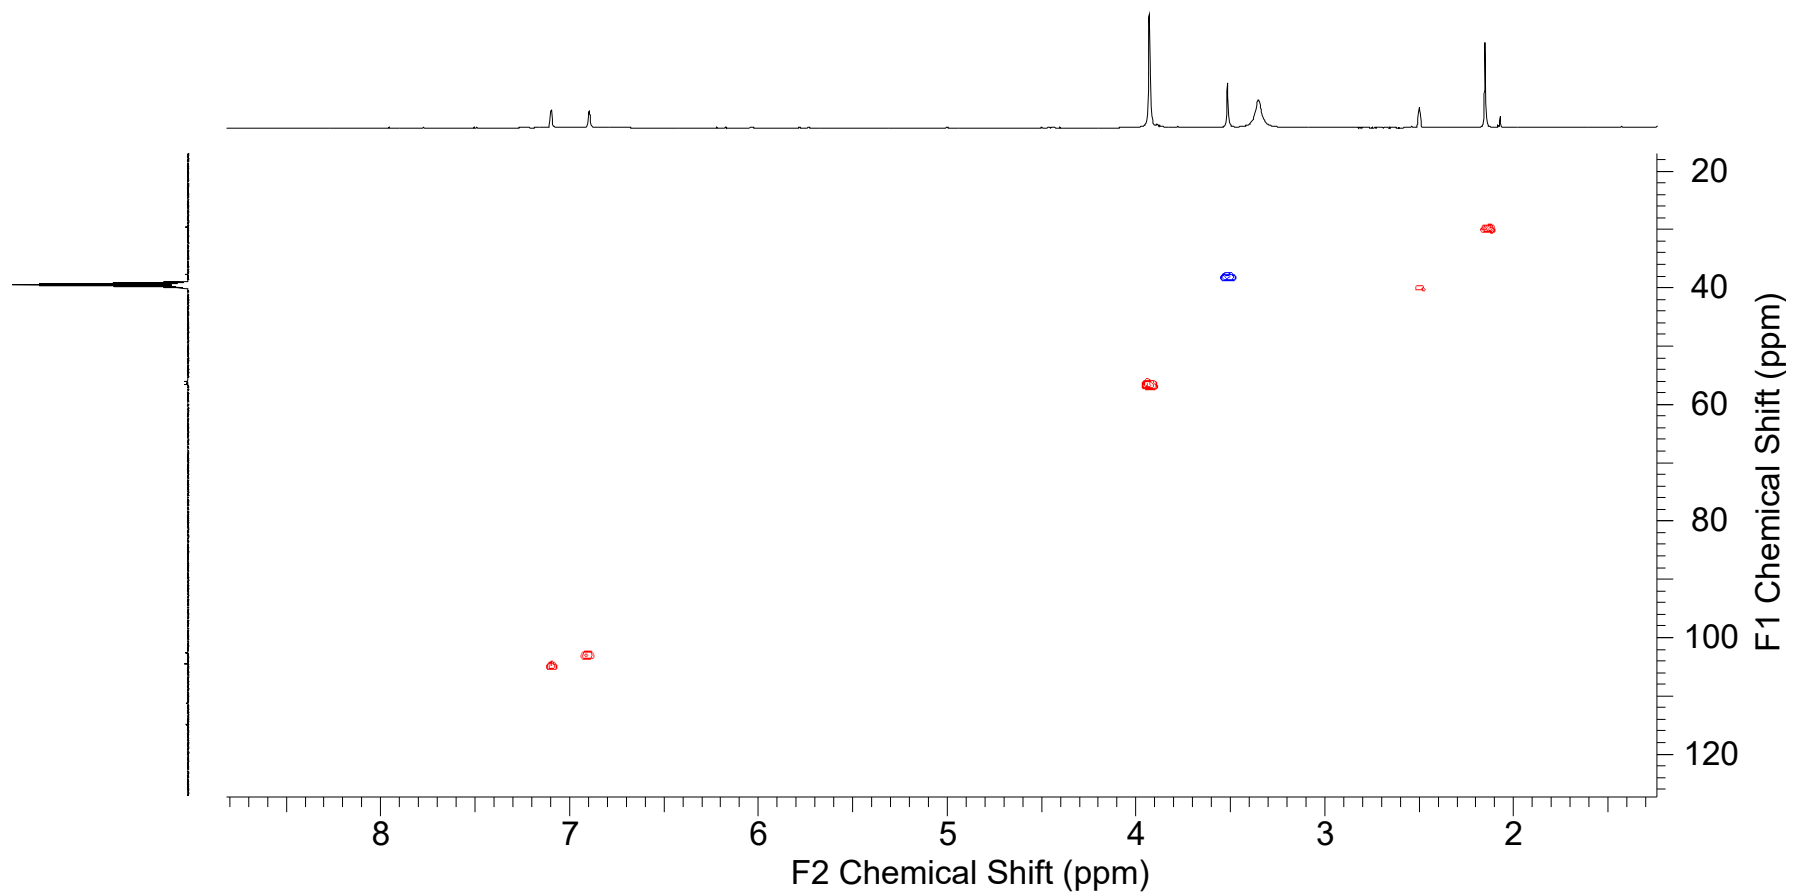

**Figure S9.** HSQC (DMSO-*d*<sub>6</sub>) of compound 2.

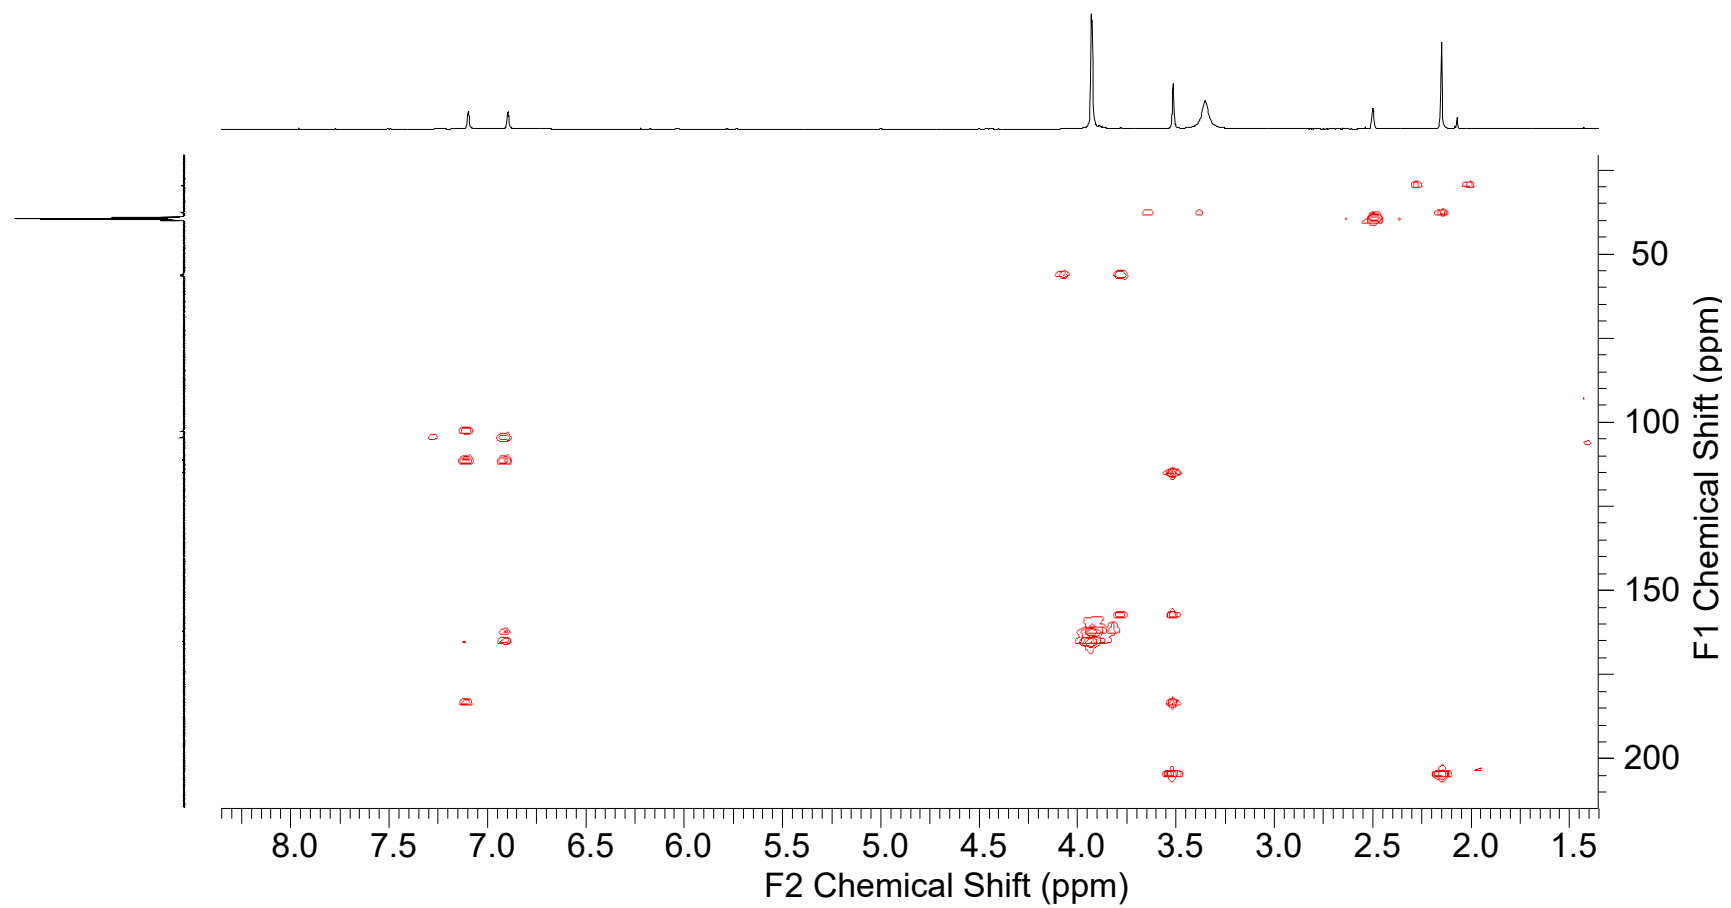

**Figure S10.** HMBC (DMSO- $d_6$ ) of compound 2.

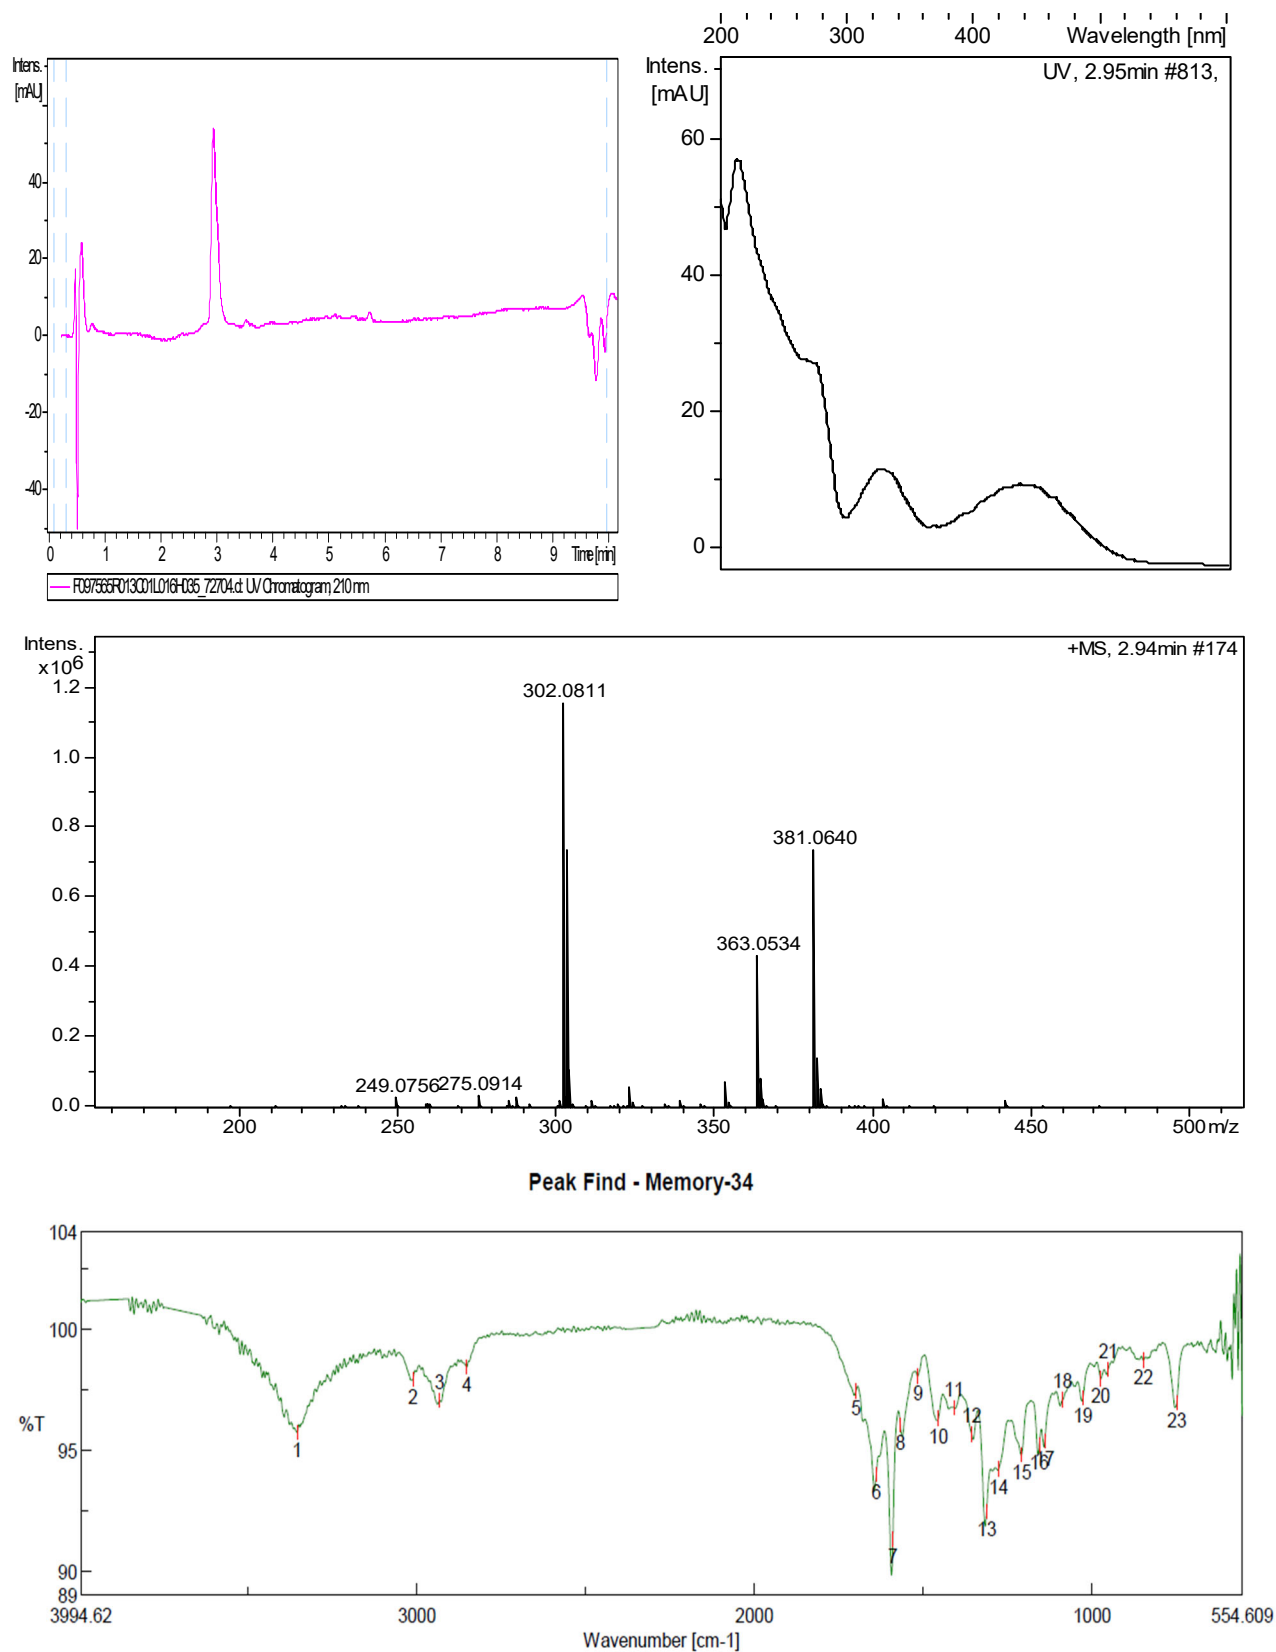

**Figure S11.** HPLC 210 nm trace, UV-Vis, ((+)-ESI-TOF) and IR spectra of compound **3** (purity 95% by UV).

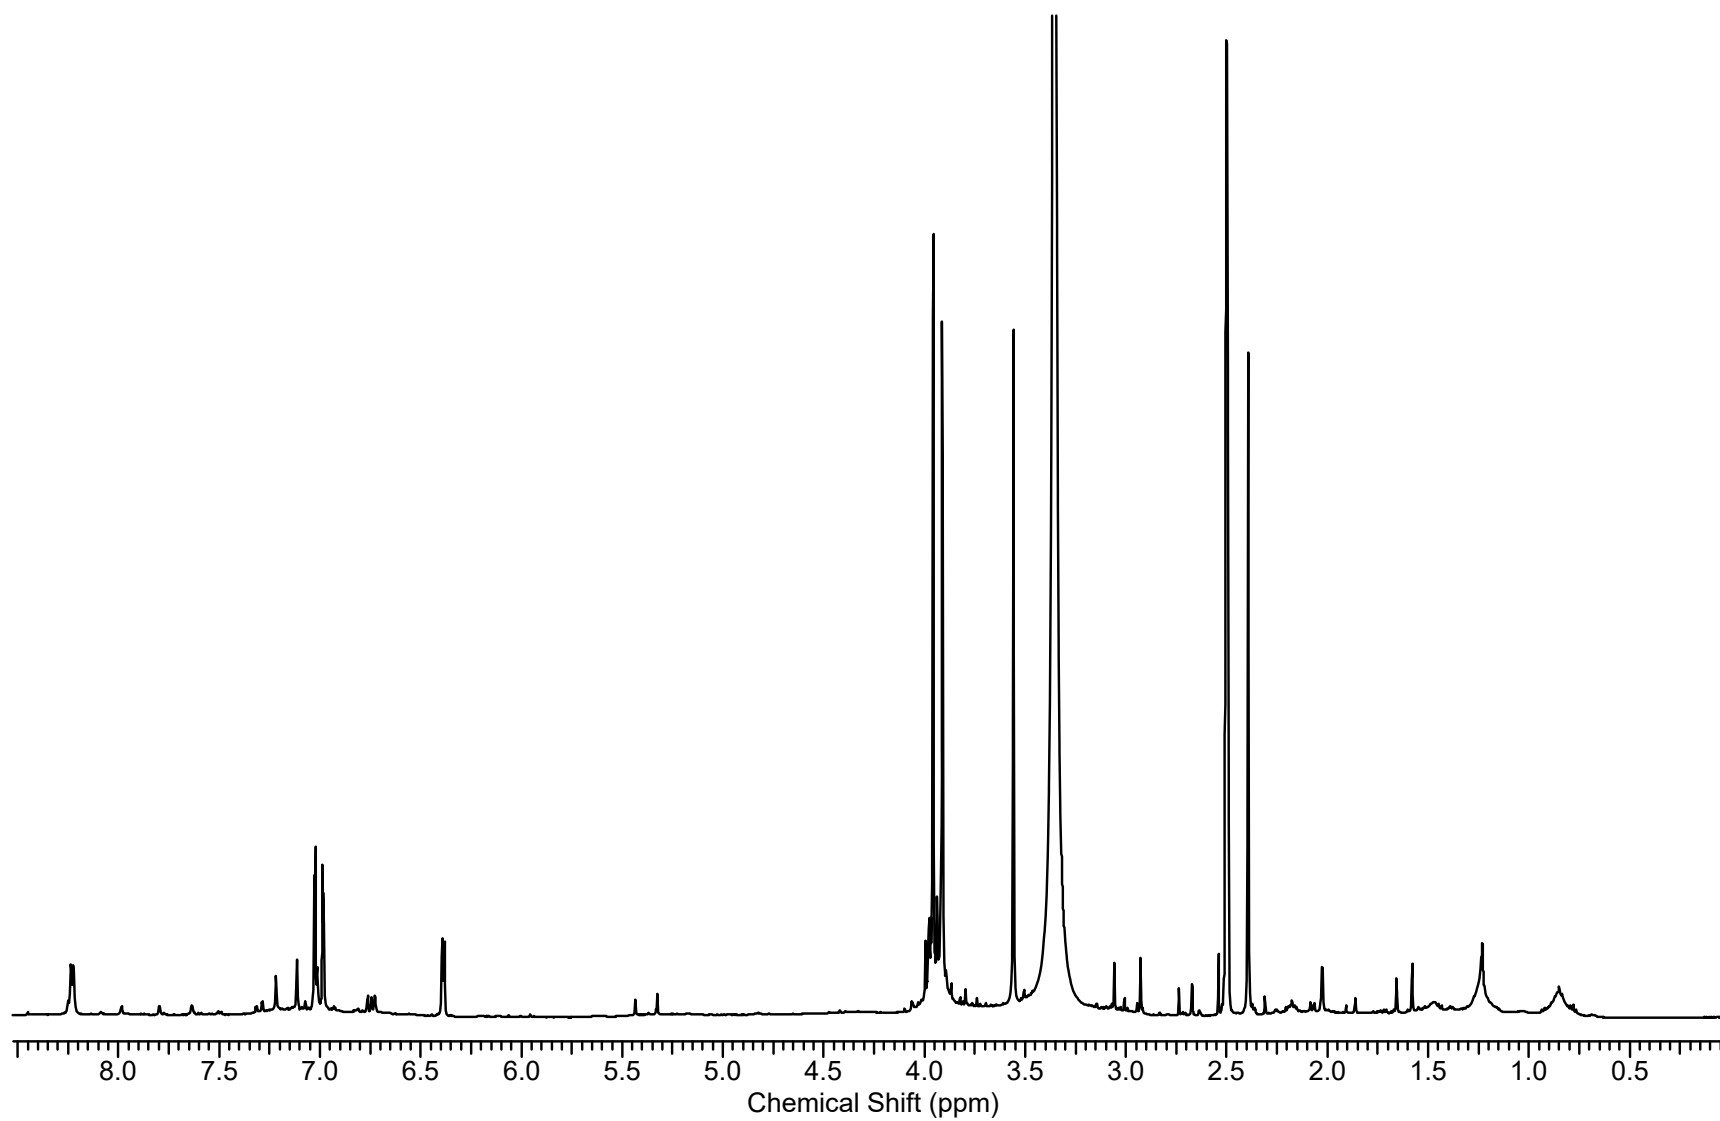

**Figure S12.**  $^1\text{H}$  NMR spectrum ( $\text{DMSO-}d_6$ ) of compound 3.

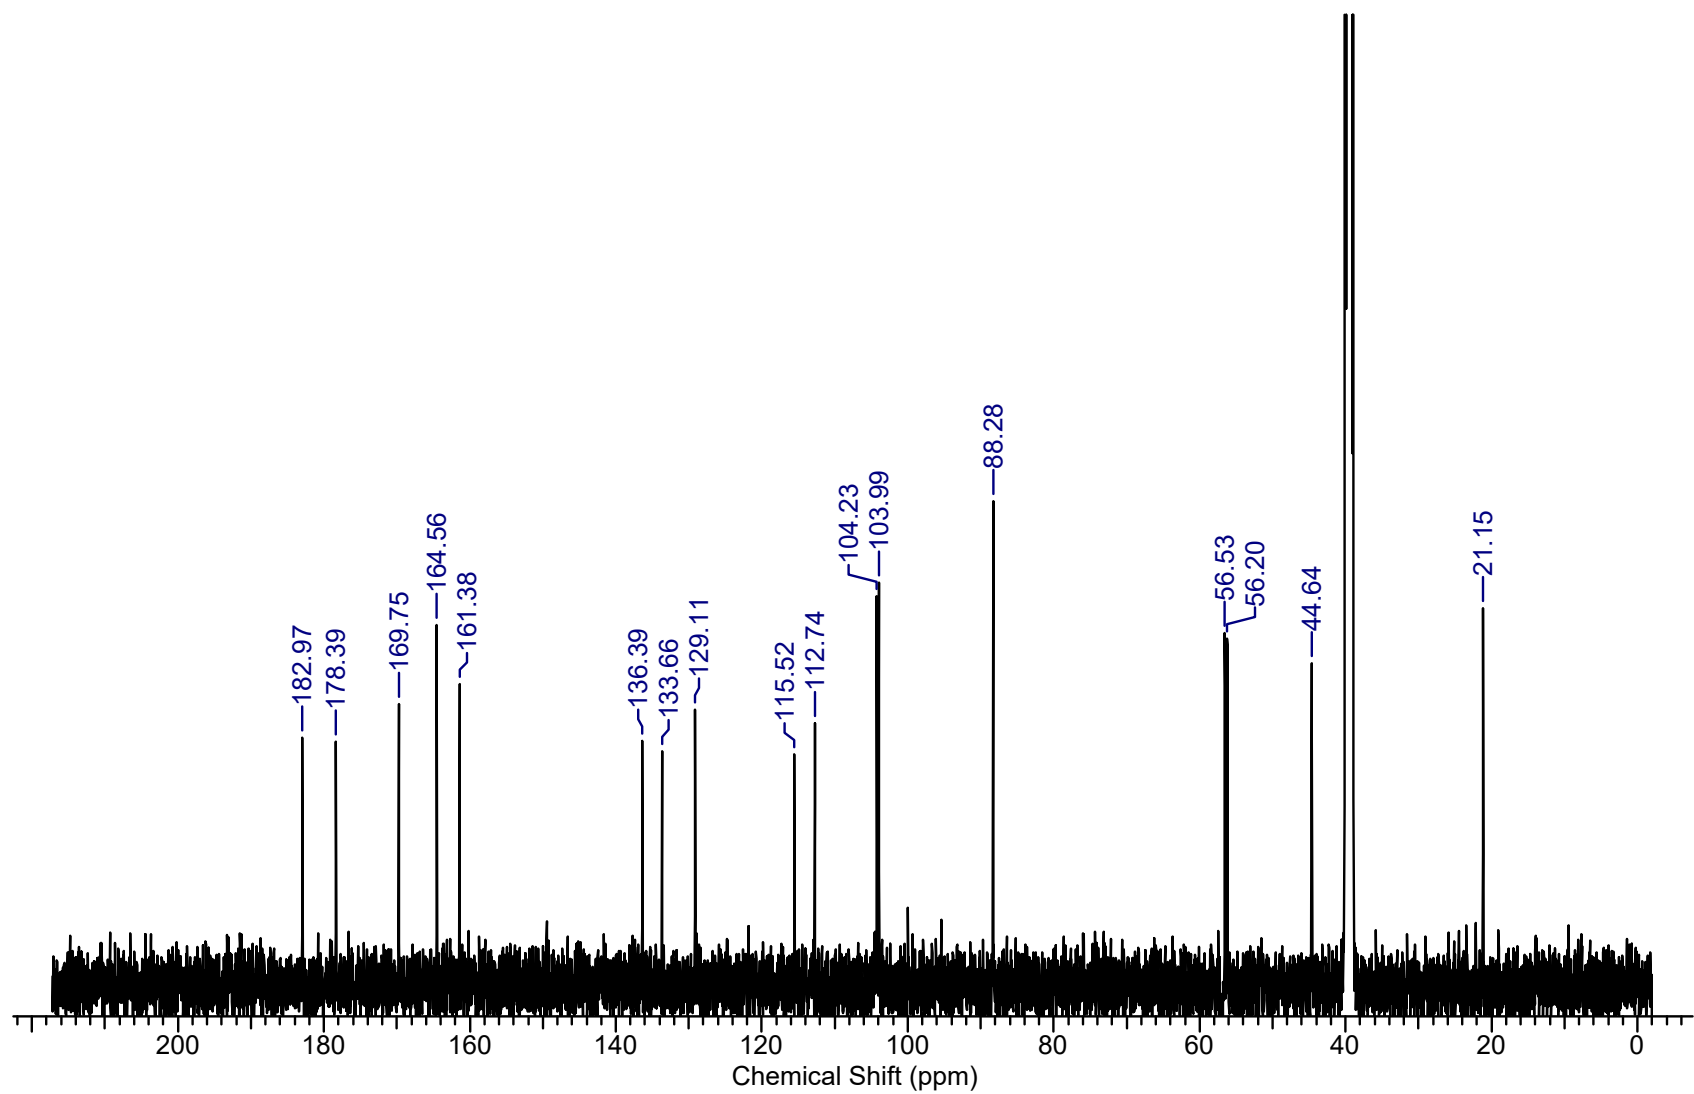

Figure S13.  $^{13}\text{C}$  NMR spectrum ( $\text{DMSO}-d_6$ ) of compound 3.

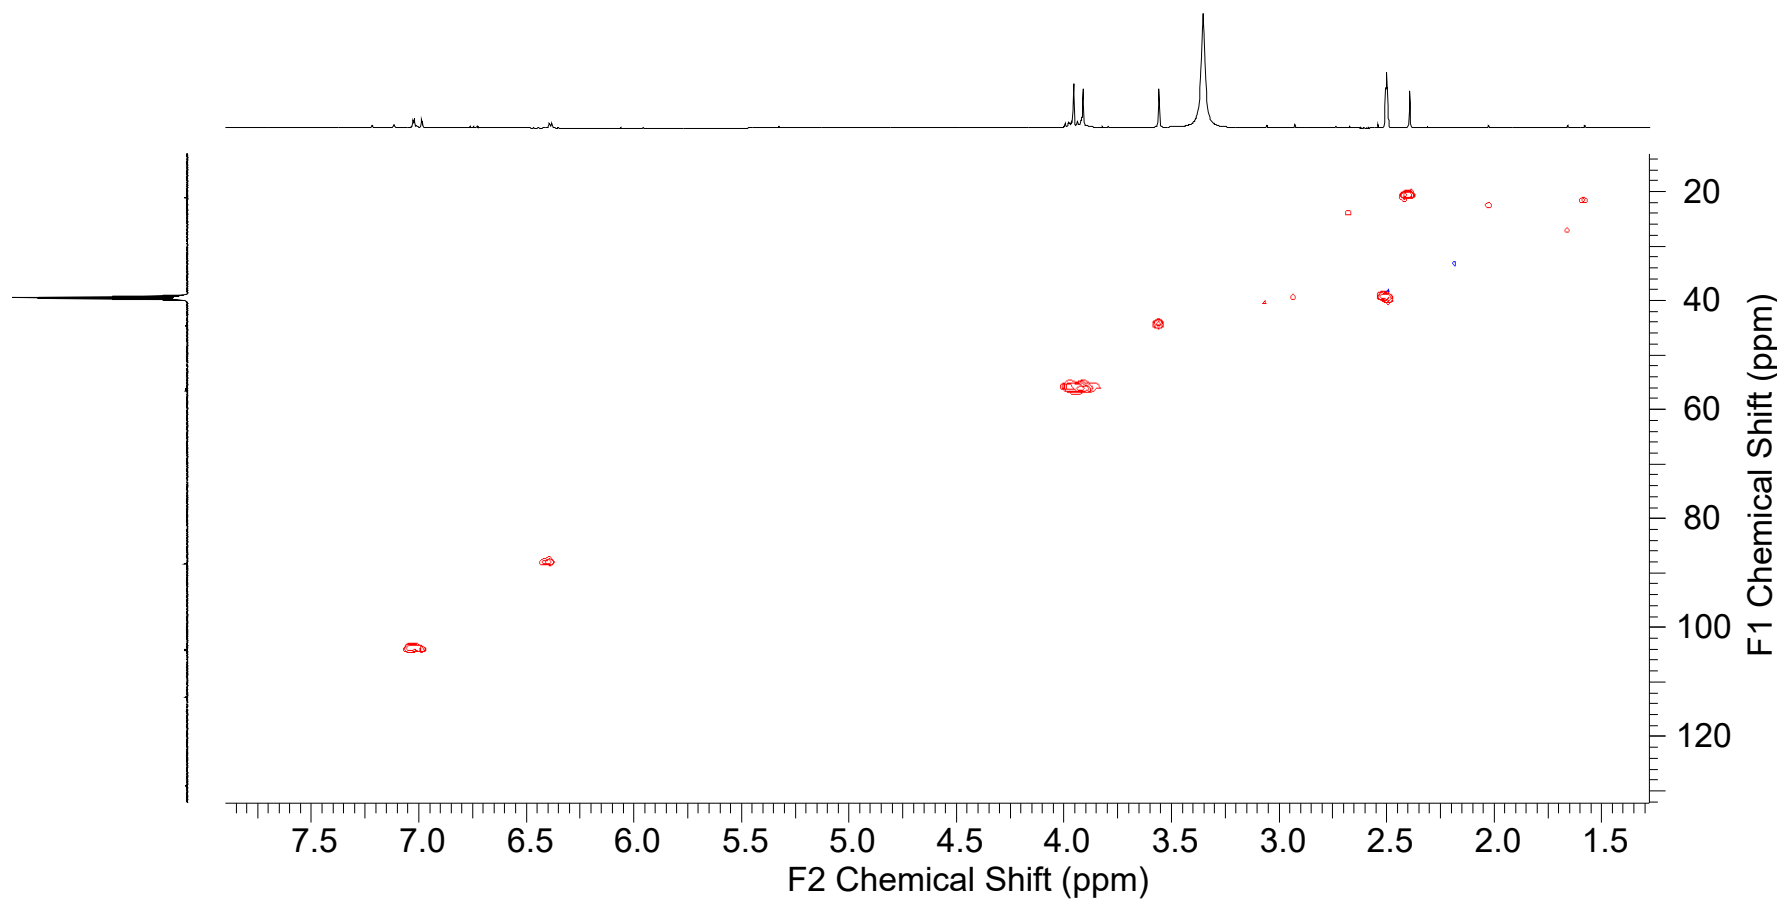

**Figure S14.** HSQC (DMSO- $d_6$ ) of compound 3.

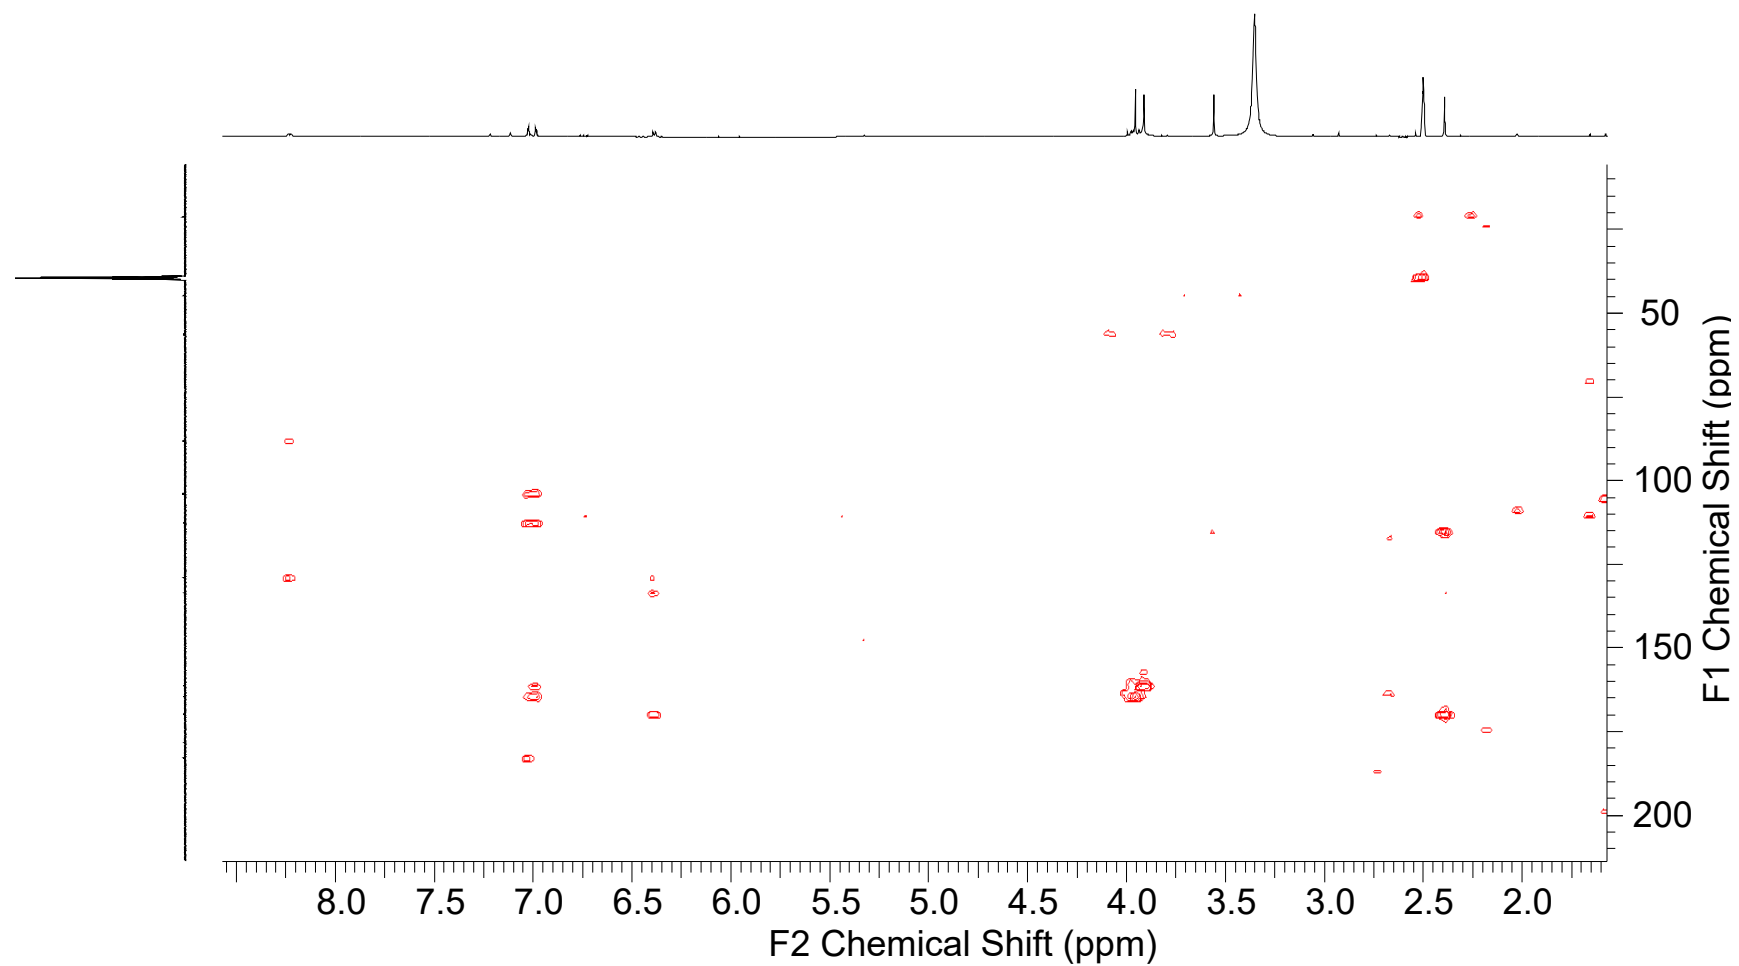

Figure S15. HMBC (DMSO-*d*<sub>6</sub>) of compound 3

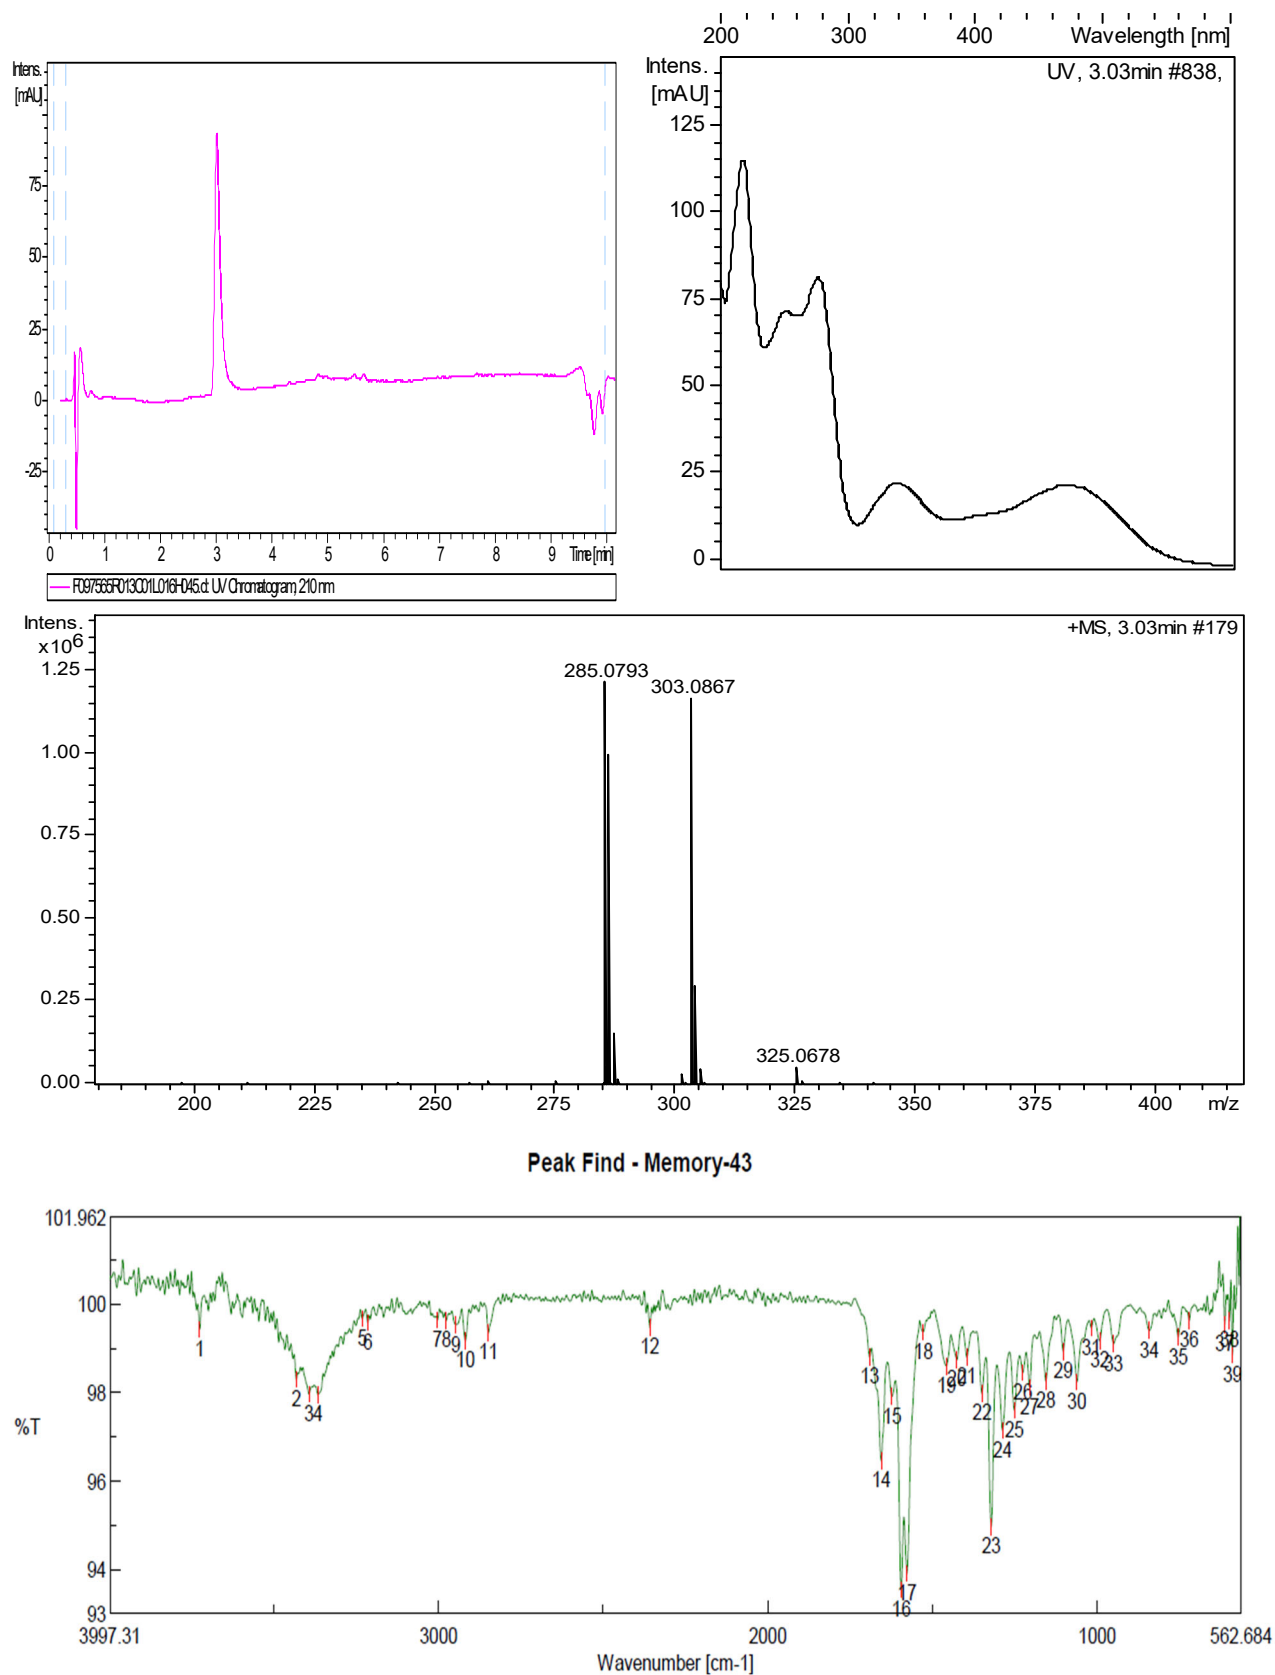

**Figure S16.** HPLC 210 nm trace, UV-Vis, ((+)-ESI-TOF) and IR spectra of compound **4** (purity 94% by UV).



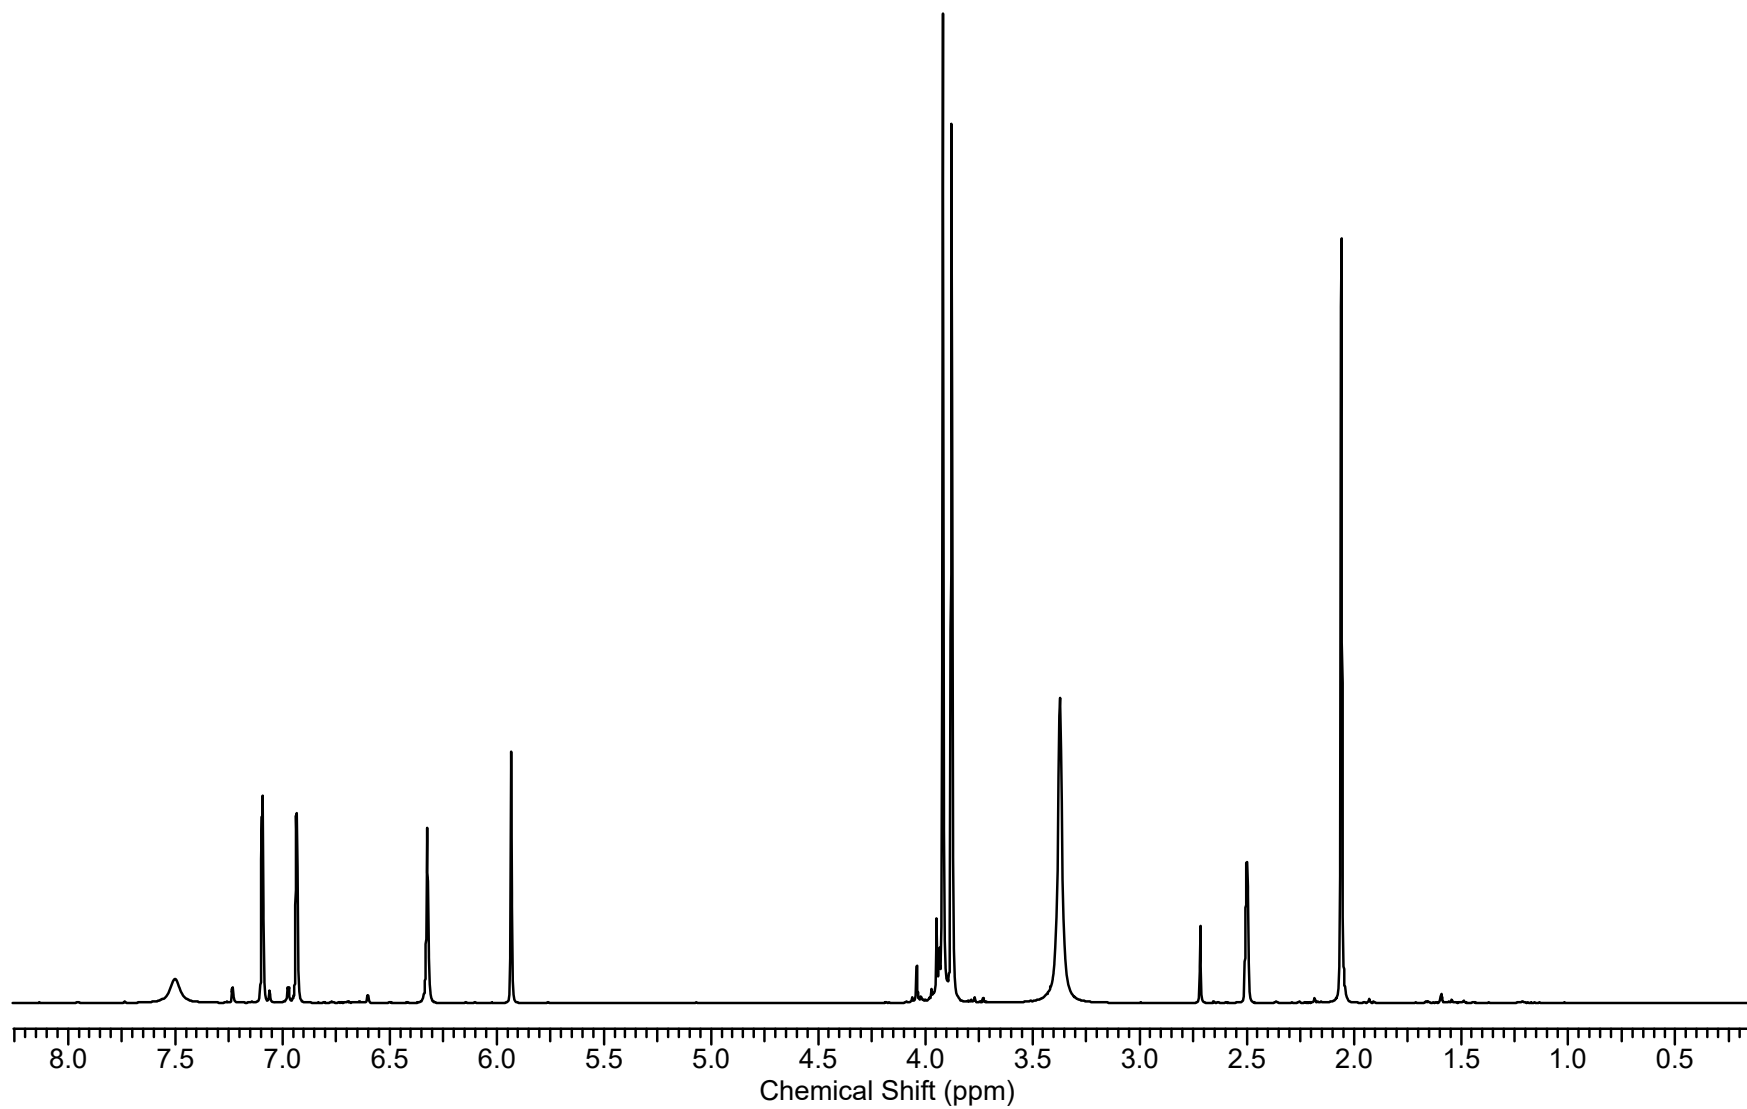

**Figure S17.**  $^1\text{H}$  NMR spectrum ( $\text{DMSO-}d_6$ ) of compound 4.

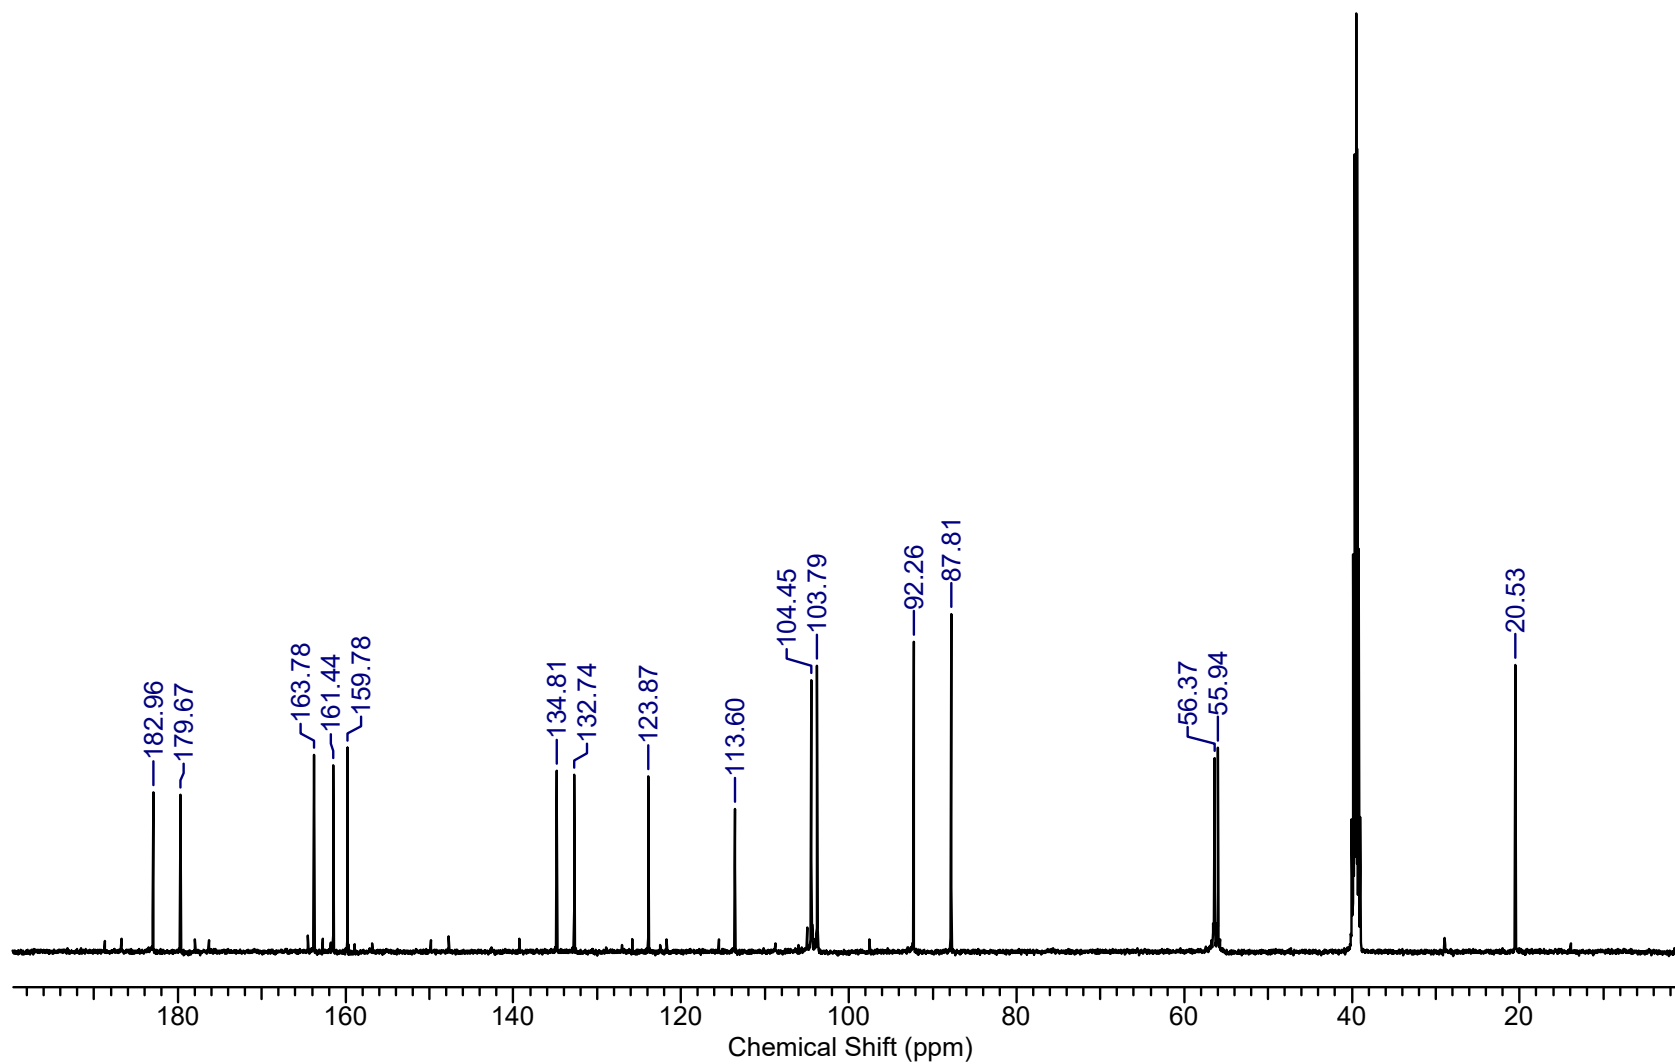

Figure S18. <sup>13</sup>C NMR spectrum (DMSO-*d*<sub>6</sub>) of compound 4.

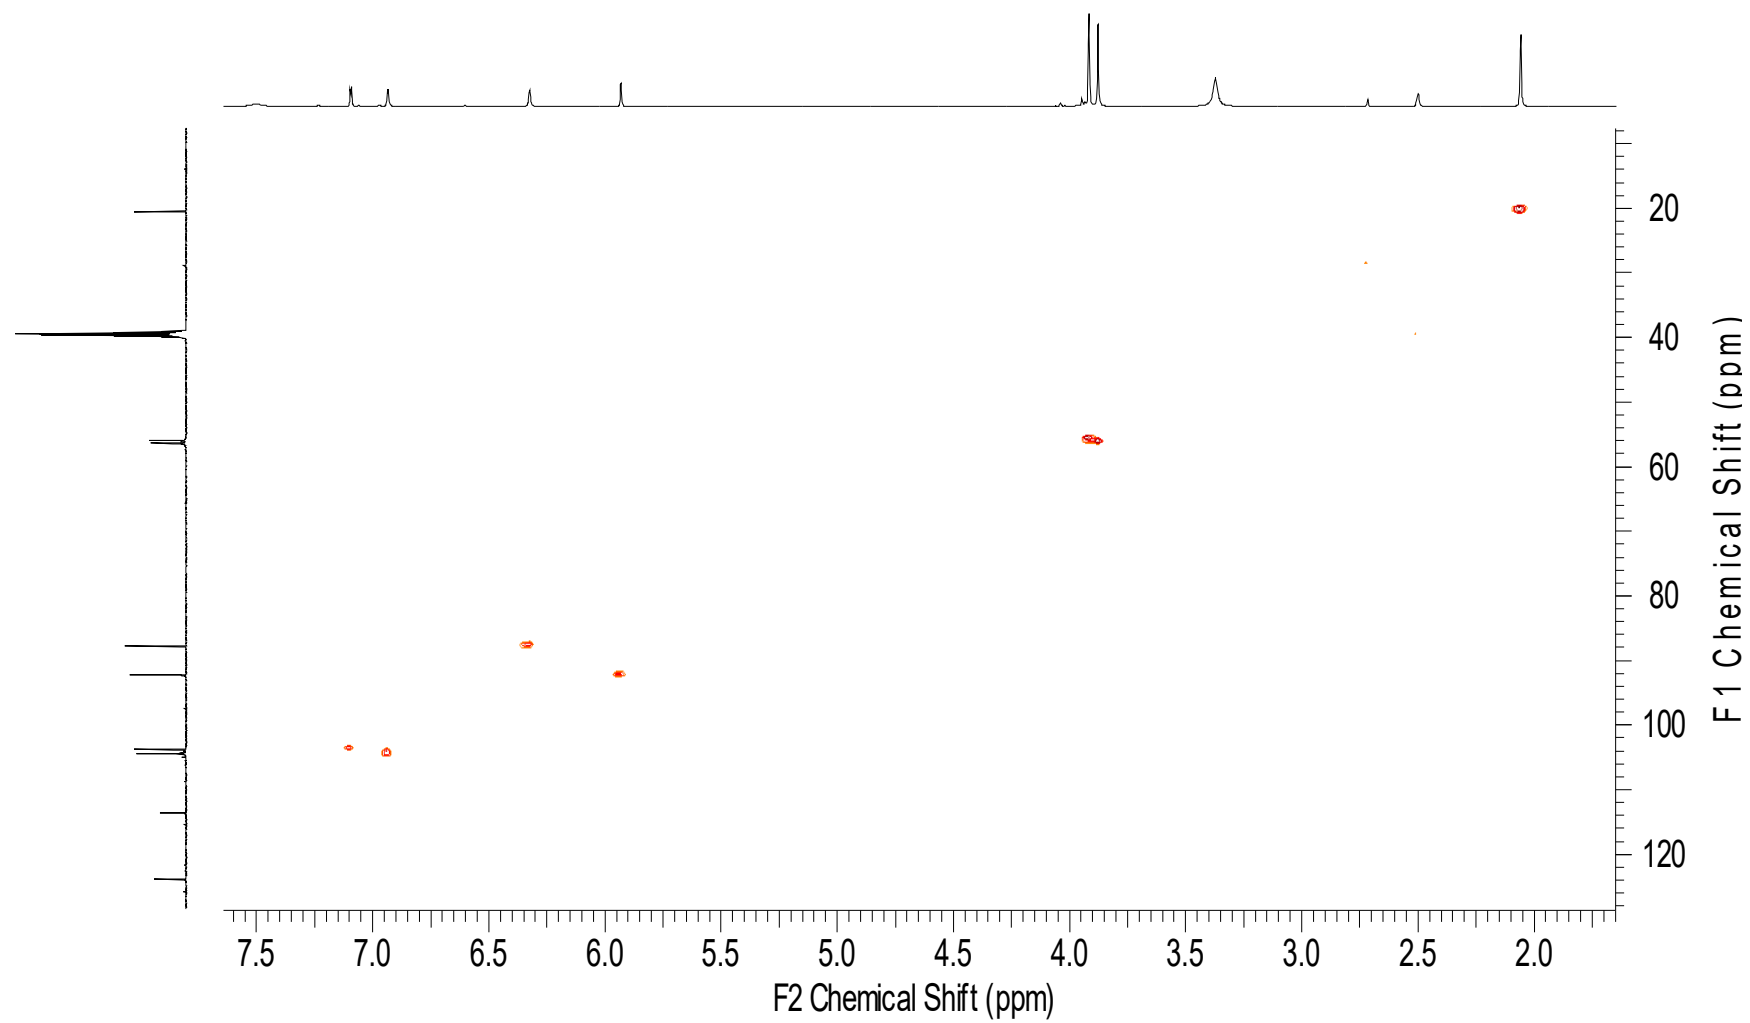

Figure S19. HSQC (DMSO- $d_6$ ) of compound 4.

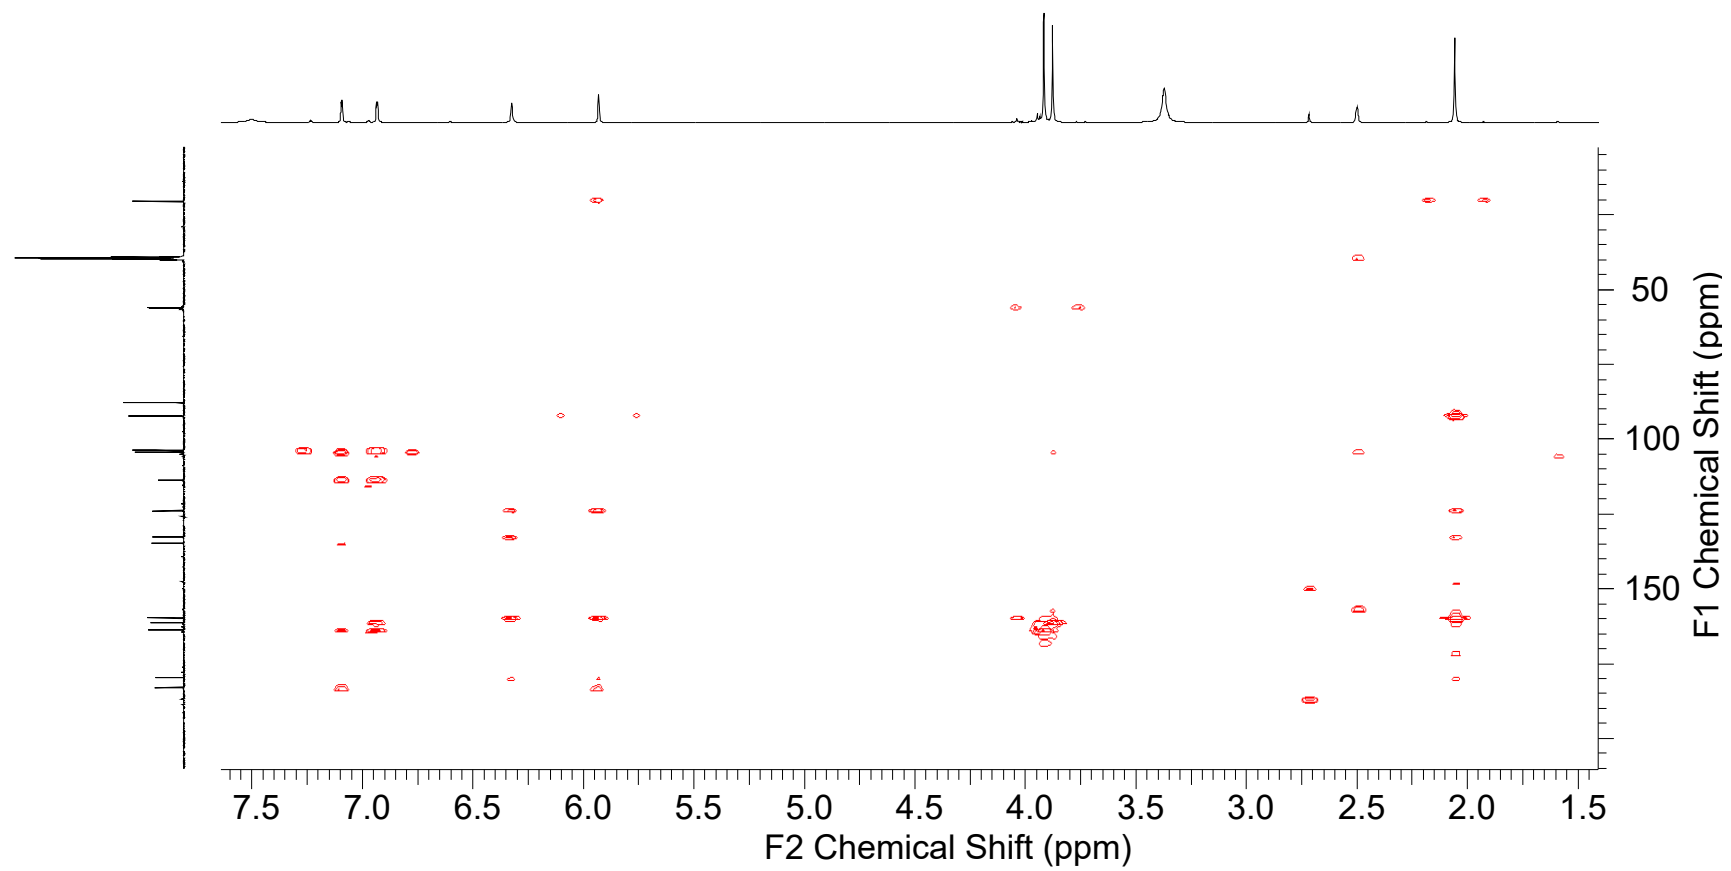

Figure S20. HMBC (DMSO- $d_6$ ) of compound 4.

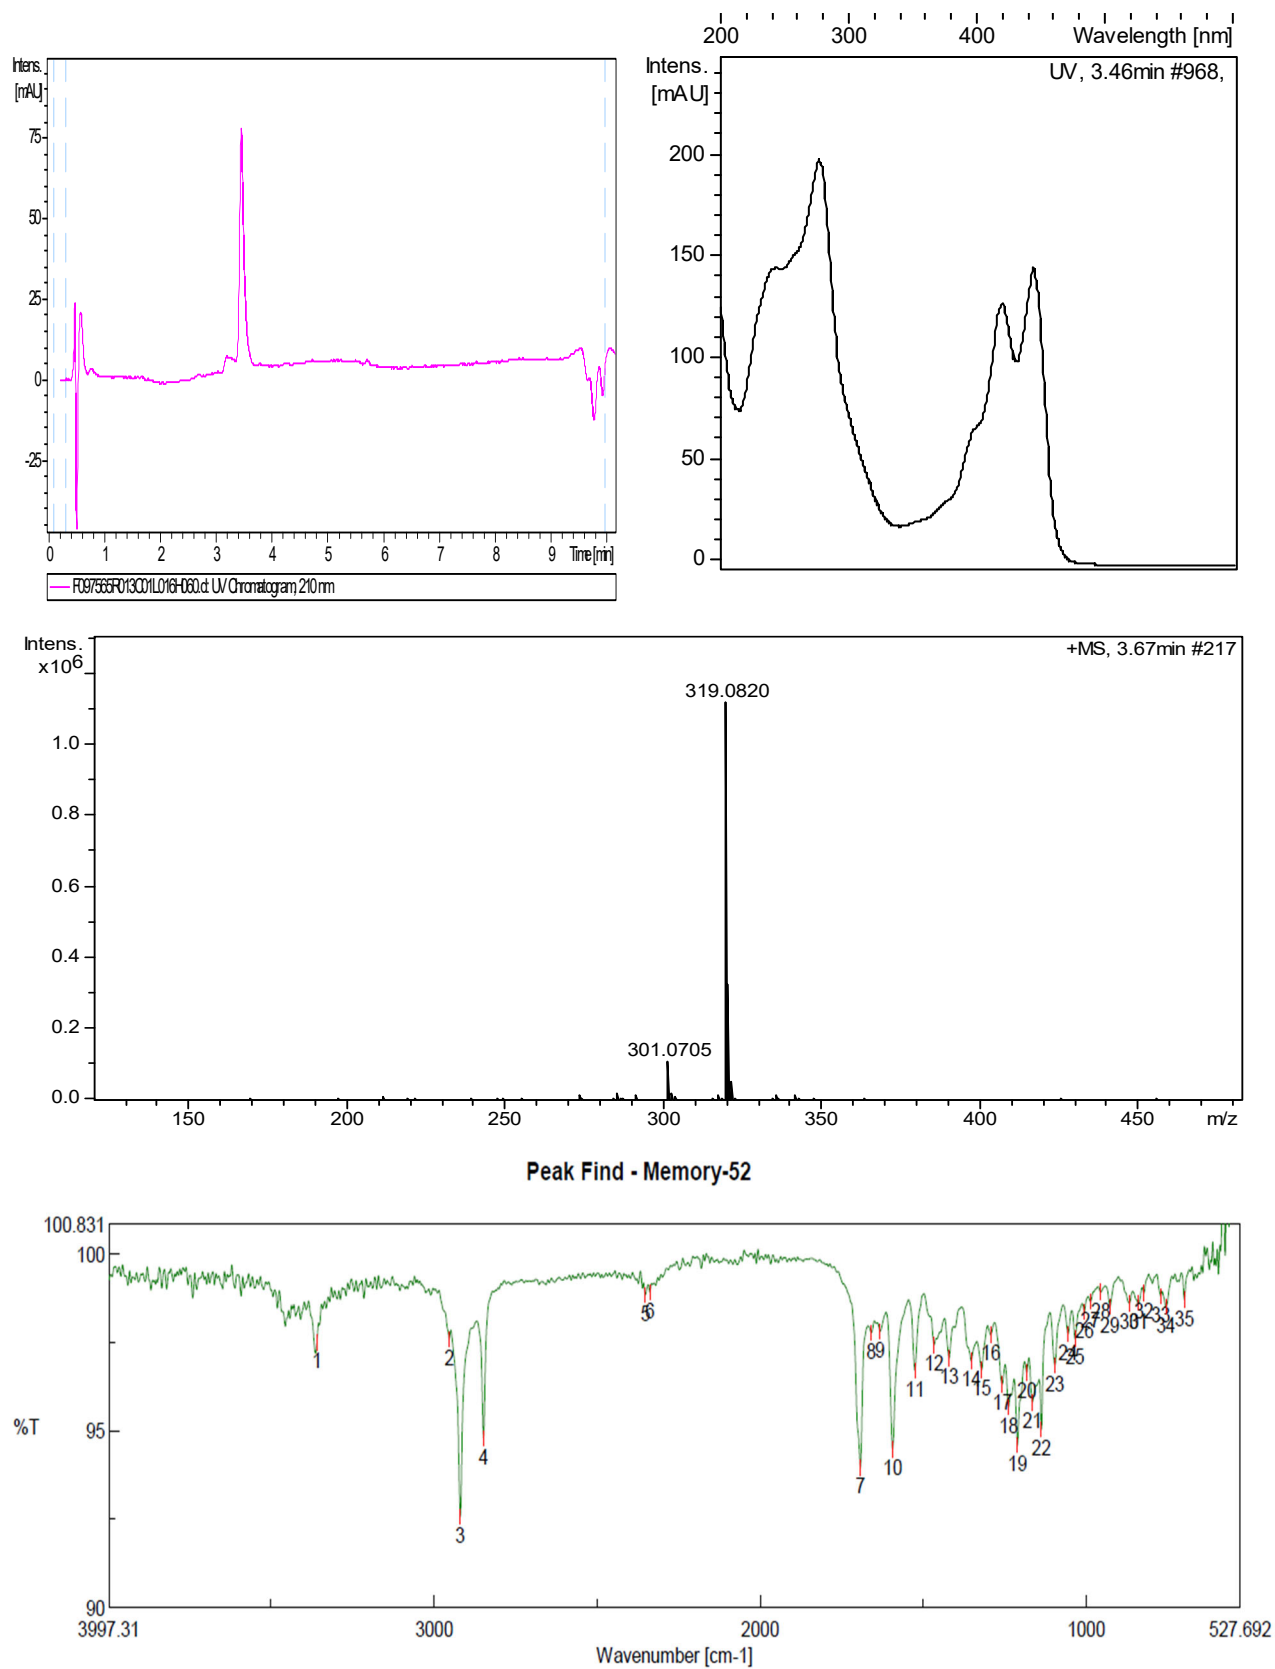

**Figure S21.** HPLC 210 nm trace, UV-Vis, ((+)-ESI-TOF) and IR spectra of compound 5 (purity 89% by UV).

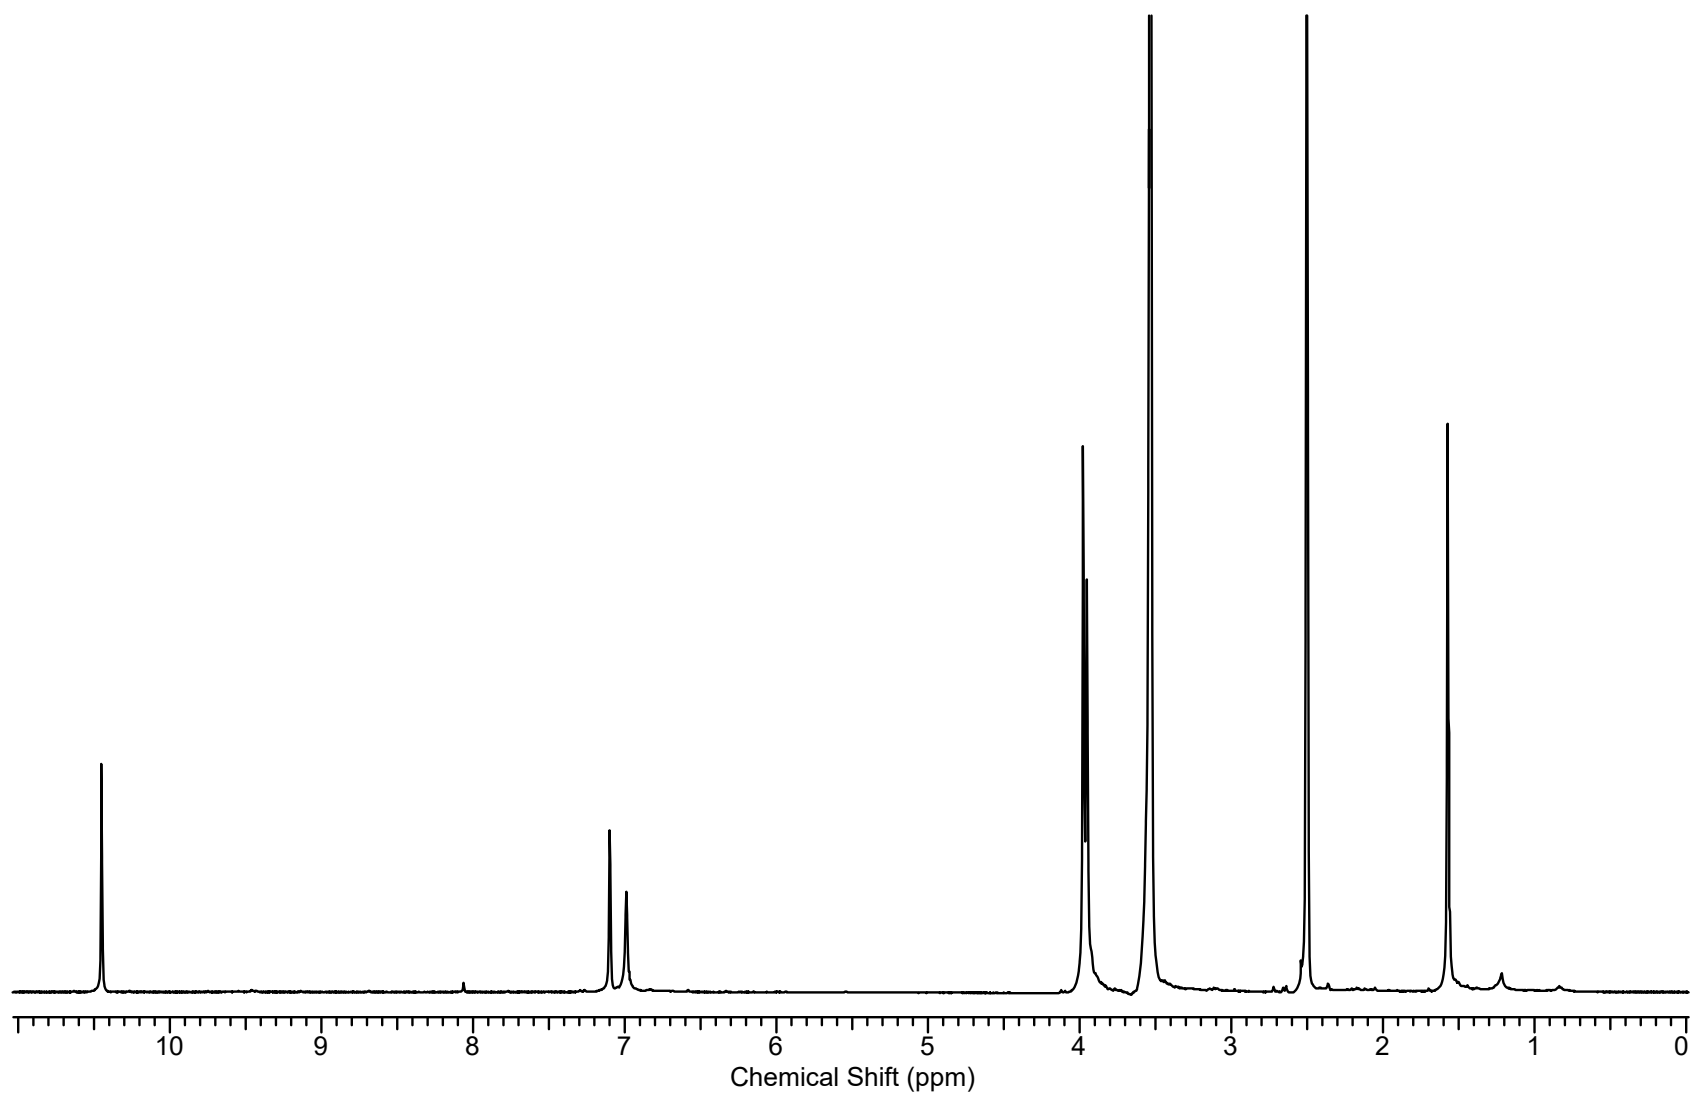

**Figure S22.**  $^1\text{H}$  NMR spectrum ( $\text{DMSO-}d_6$ ) of compound 5.

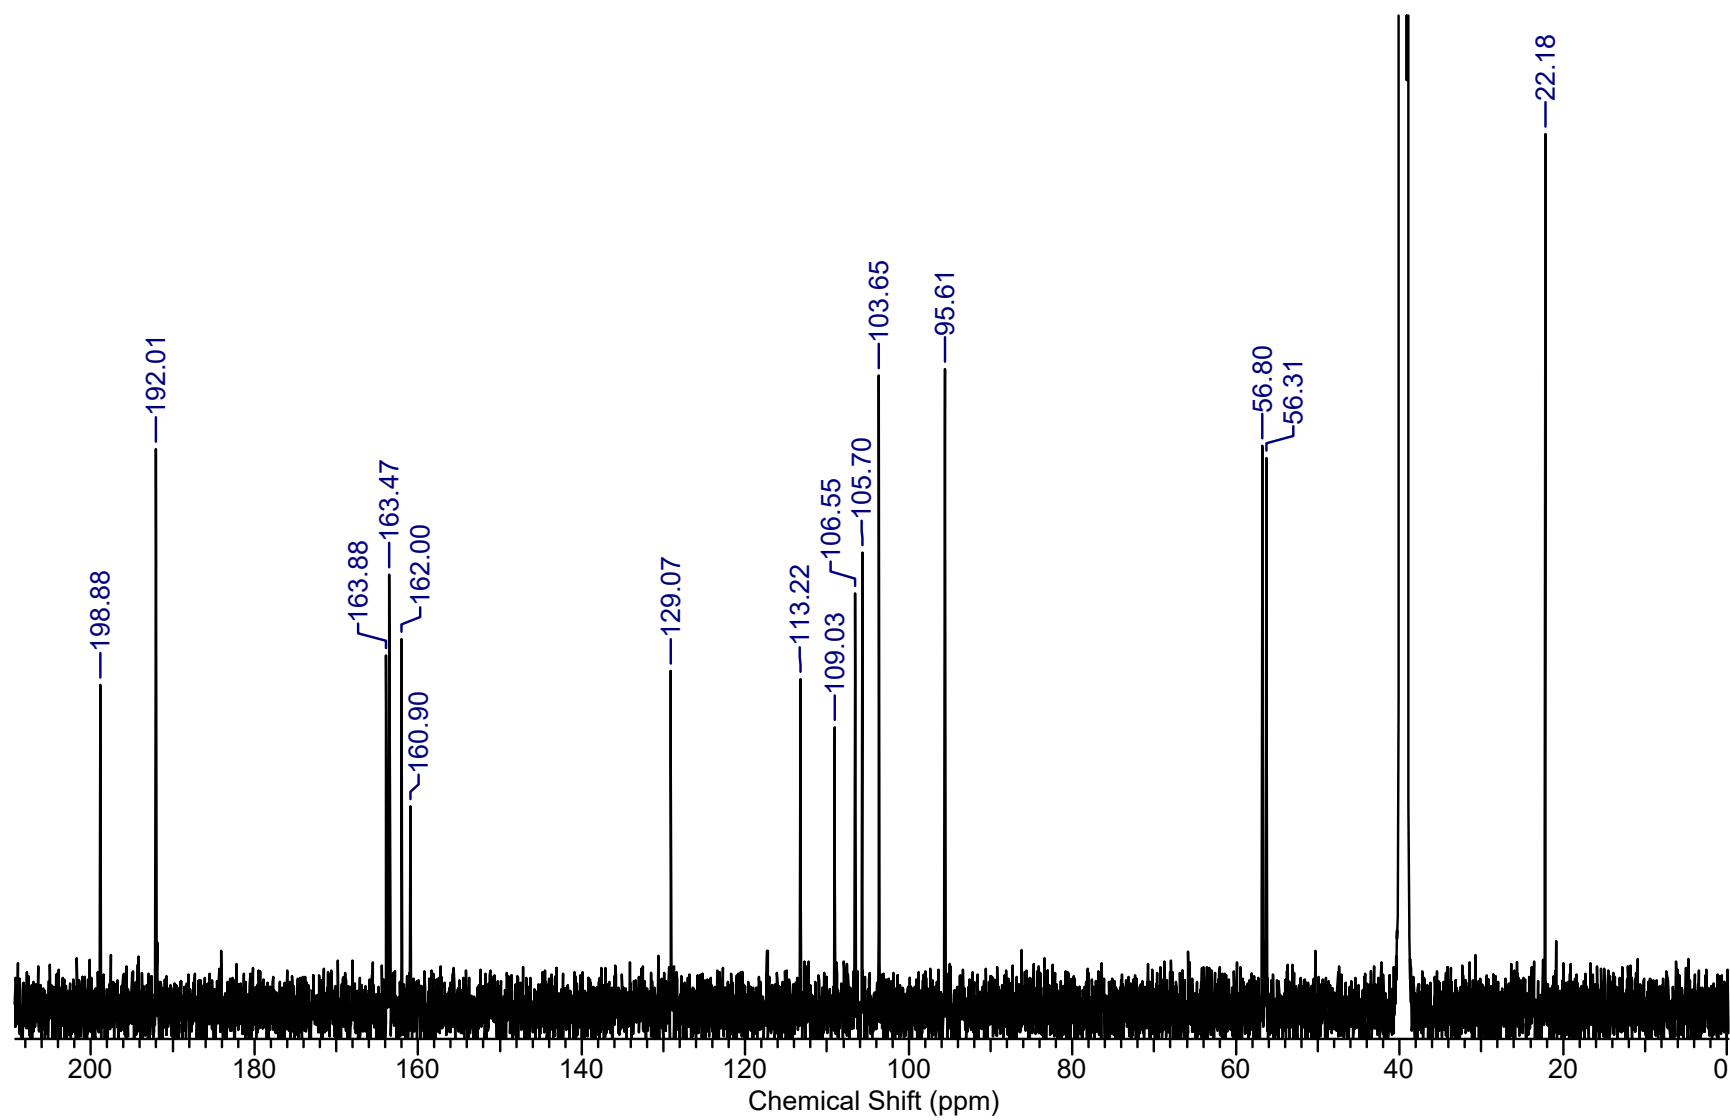

**Figure S23.** <sup>13</sup>C NMR spectrum (DMSO-*d*<sub>6</sub>) of compound 5.

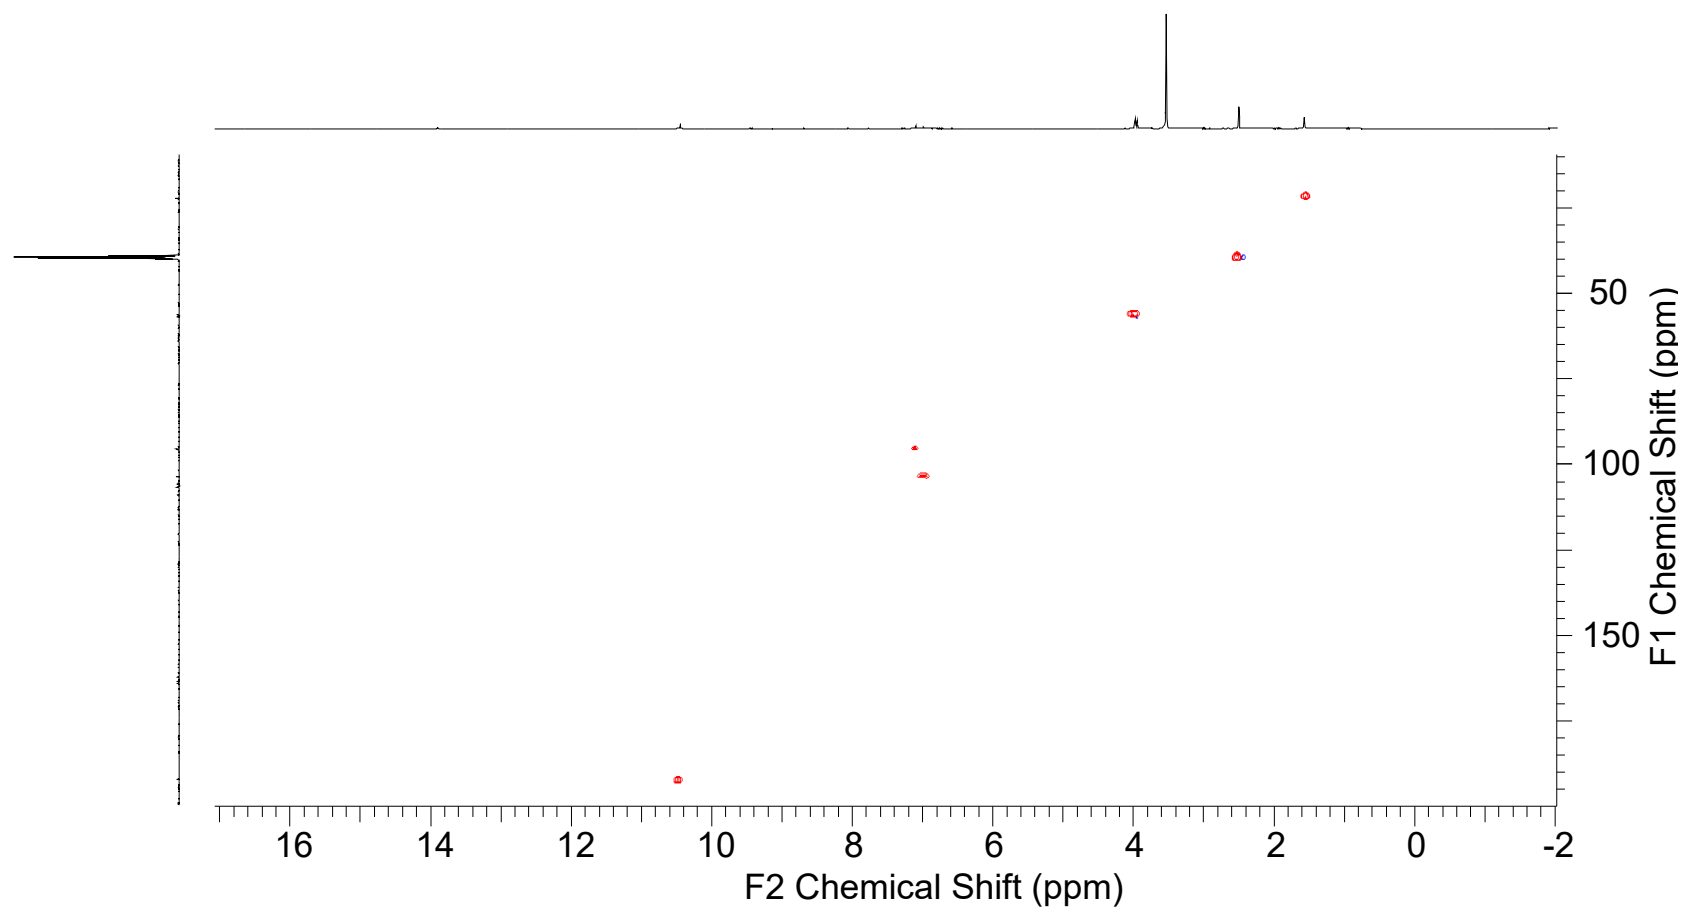

**Figure S24.** HSQC (DMSO-*d*<sub>6</sub>) of compound 5.



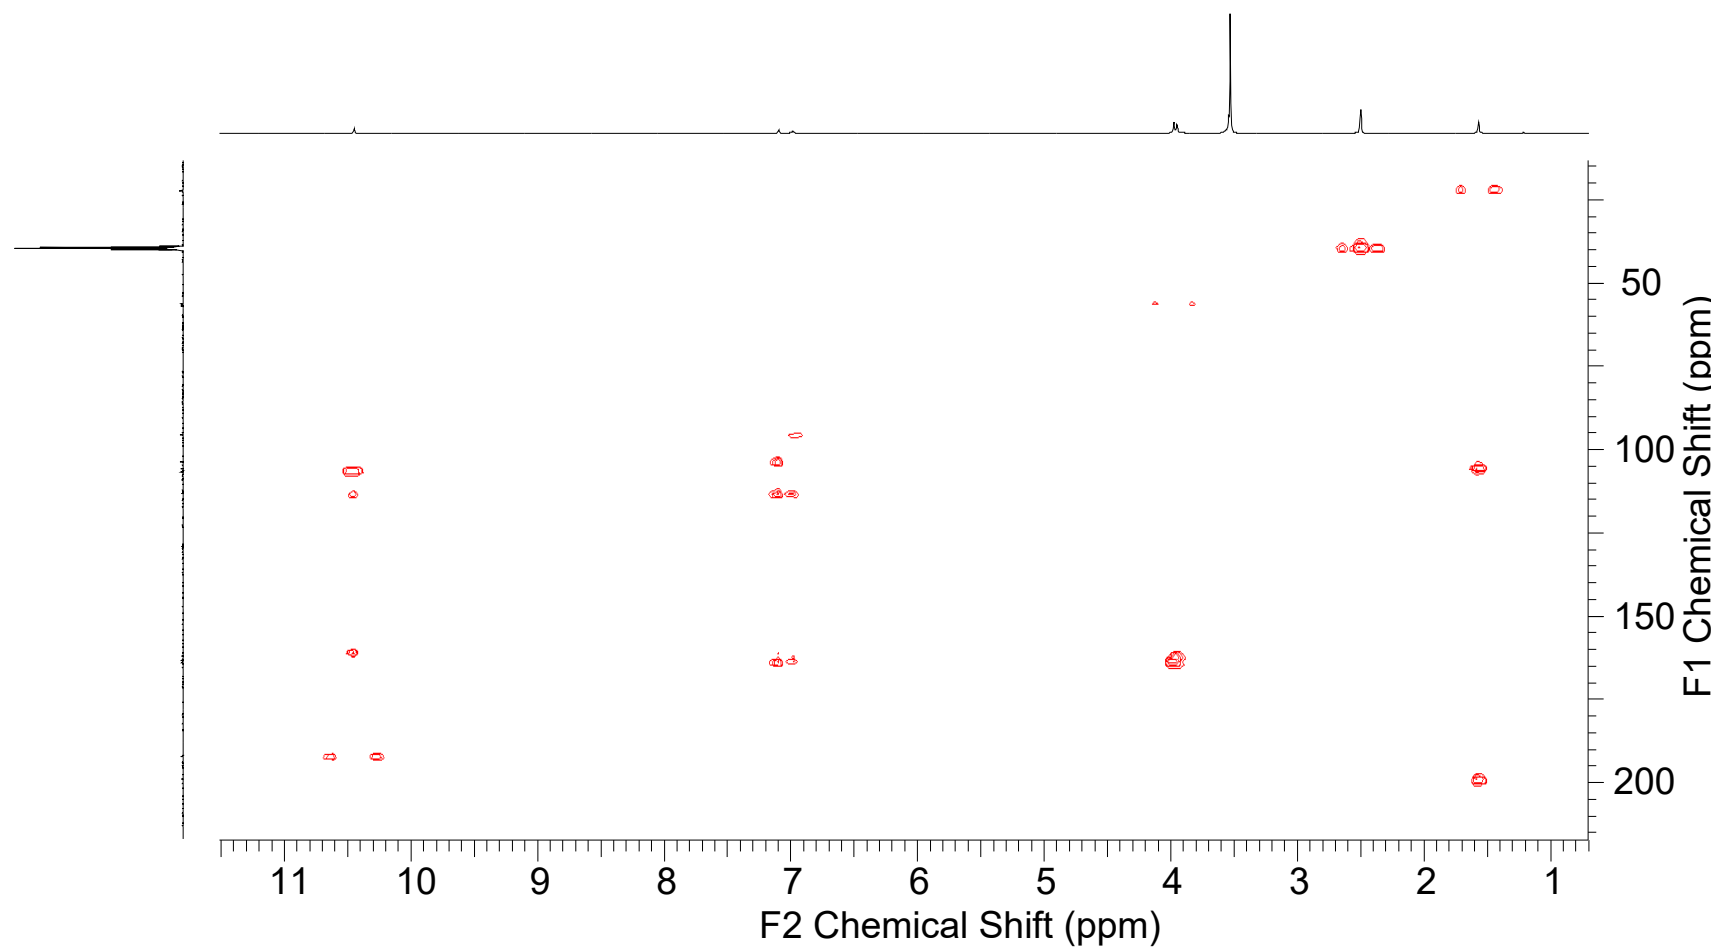

Figure S25. HMBC (DMSO- $d_6$ ) of compound 5.
